# Supplementary material for: Synthesis and Antiproliferative Activity of Minor Hops Prenylflavonoids and New Insights on Prenyl Group Cyclization
Source: PubMed Central journal article supplement (PMC6017146; doi:10.3390/molecules23040776), 2018-03-28

# Synthesis and antiproliferative activity of hops minor prenylflavonoids and new insights on prenyl group cyclization

## SUPPLEMENTARY MATERIALS

Jarosław Popłoński<sup>1\*</sup>, Eliza Turlej<sup>2</sup>, Sandra Sordon<sup>1</sup>, Tomasz Tronina<sup>1</sup>, Agnieszka Bartmańska<sup>1</sup>, Joanna Wietrzyk<sup>2</sup>, Ewa Huszcza<sup>2</sup>

<sup>1</sup> Department of Chemistry, Wrocław University of Environmental and Life Sciences, Norwida 25, 50-375 Wrocław, Poland, jaroslaw.poplonski@upwr.edu.pl

<sup>2</sup> NeoLek Laboratory of Experimental Anticancer Therapy, Ludwik Hirszfeld Institute of Immunology and Experimental Therapy, Polish Academy of Sciences, Department of Experimental Oncology, Weigla 12, 53-114 Wrocław, Poland, wietrzyk@iitd.pan.wroc.pl

\* Correspondence: jaroslaw.poplonski@upwr.edu.pl; Tel.: +48-71-320-5197

### List of content:

1. <sup>1</sup>H NMR Spectrum of **2** - xanthohumol C.
2. <sup>13</sup>C NMR Spectrum of **2** - xanthohumol C.
3. <sup>1</sup>H NMR Spectrum of **3** - 1'',2''-dihydroxanthohumol C.
4. <sup>13</sup>C NMR Spectrum of **3** - 1'',2''-dihydroxanthohumol C.
5. <sup>1</sup>H NMR Spectrum of **4** - 1'',2''-dihydroxanthohumol K.
6. <sup>13</sup>C NMR Spectrum of **4** - 1'',2''-dihydroxanthohumol K.
7. <sup>1</sup>H NMR Spectrum of **6** - xanthohumol K.
8. <sup>13</sup>C NMR Spectrum of **6** - xanthohumol K.
9. <sup>1</sup>H NMR Spectrum of **7** - 4,4'-dimethoxymethyl xanthohumol
10. <sup>1</sup>H NMR Spectrum of **8** - 1'',2'', $\alpha,\beta$ -tetrahydroxanthohumol C.
11. <sup>13</sup>C NMR Spectrum of **8** - 1'',2'', $\alpha,\beta$ -tetrahydroxanthohumol C.
12. <sup>1</sup>H NMR Spectrum of **9** - 1'',2'', $\alpha,\beta$ -tetrahydroxanthohumol K.
13. <sup>13</sup>C NMR Spectrum of **9** - 1'',2'', $\alpha,\beta$ -tetrahydroxanthohumol K.
14. <sup>1</sup>H NMR Spectrum of **10** -1'',2''-Dihydroisoxanthohumol C.
15. <sup>13</sup>C NMR Spectrum of **10** -1'',2''-Dihydroisoxanthohumol C.
16. <sup>1</sup>H NMR Spectrum of **11a/11b** - 5,4'-dihydroxy-6'',6''-dimethyl-4'',5''-dihydropyrano-[2'',3'':7,8]flavanone and 5,4'-dihydroxy-6'',6''-dimethyl-4'',5''-dihydropyrano-[2'',3'':6,7]flavanone.
17. <sup>13</sup>C NMR Spectrum of **11a/11b** - 5,4'-dihydroxy-6'',6''-dimethyl-4'',5''-dihydropyrano-[2'',3'':7,8]flavanone and 5,4'-dihydroxy-6'',6''-dimethyl-4'',5''-dihydropyrano-[2'',3'':6,7]flavanone.
18. <sup>1</sup>H NMR Spectrum of **12** - 2,3-Dehydroisoxanthohumol C.
19. <sup>13</sup>C NMR Spectrum of **12** - 2,3-Dehydroisoxanthohumol C.
20. <sup>1</sup>H NMR Spectrum of **13** - 2,3-Dehydroisoxanthohumol.
21. <sup>13</sup>C NMR Spectrum of **13** - 2,3-Dehydroisoxanthohumol.
22. <sup>1</sup>H NMR Spectrum of **14** - 1'',2''-Dihydro-2,3-dehydroisoxanthohumol C.
23. <sup>13</sup>C NMR Spectrum of **14** - 1'',2''-Dihydro-2,3-dehydroisoxanthohumol C.

1H NMR - 2

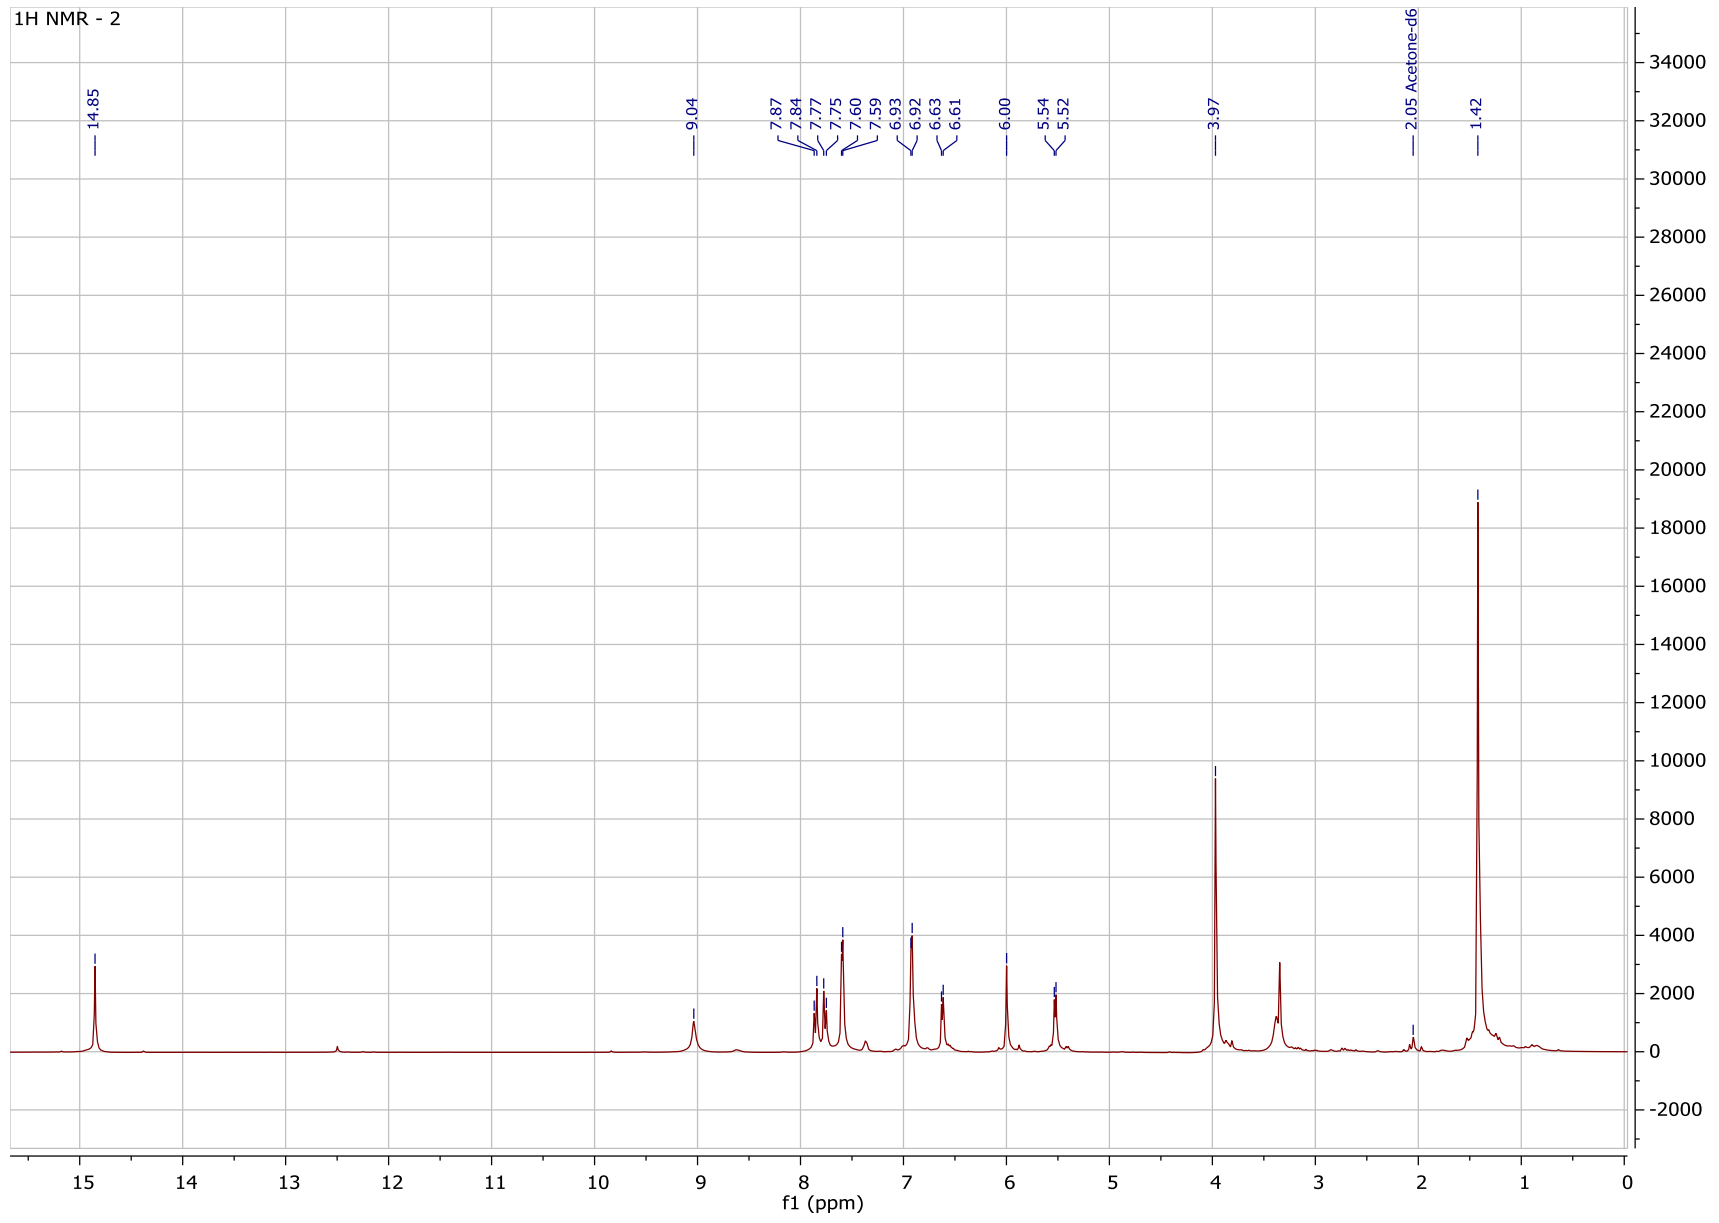

13C NMR - 2

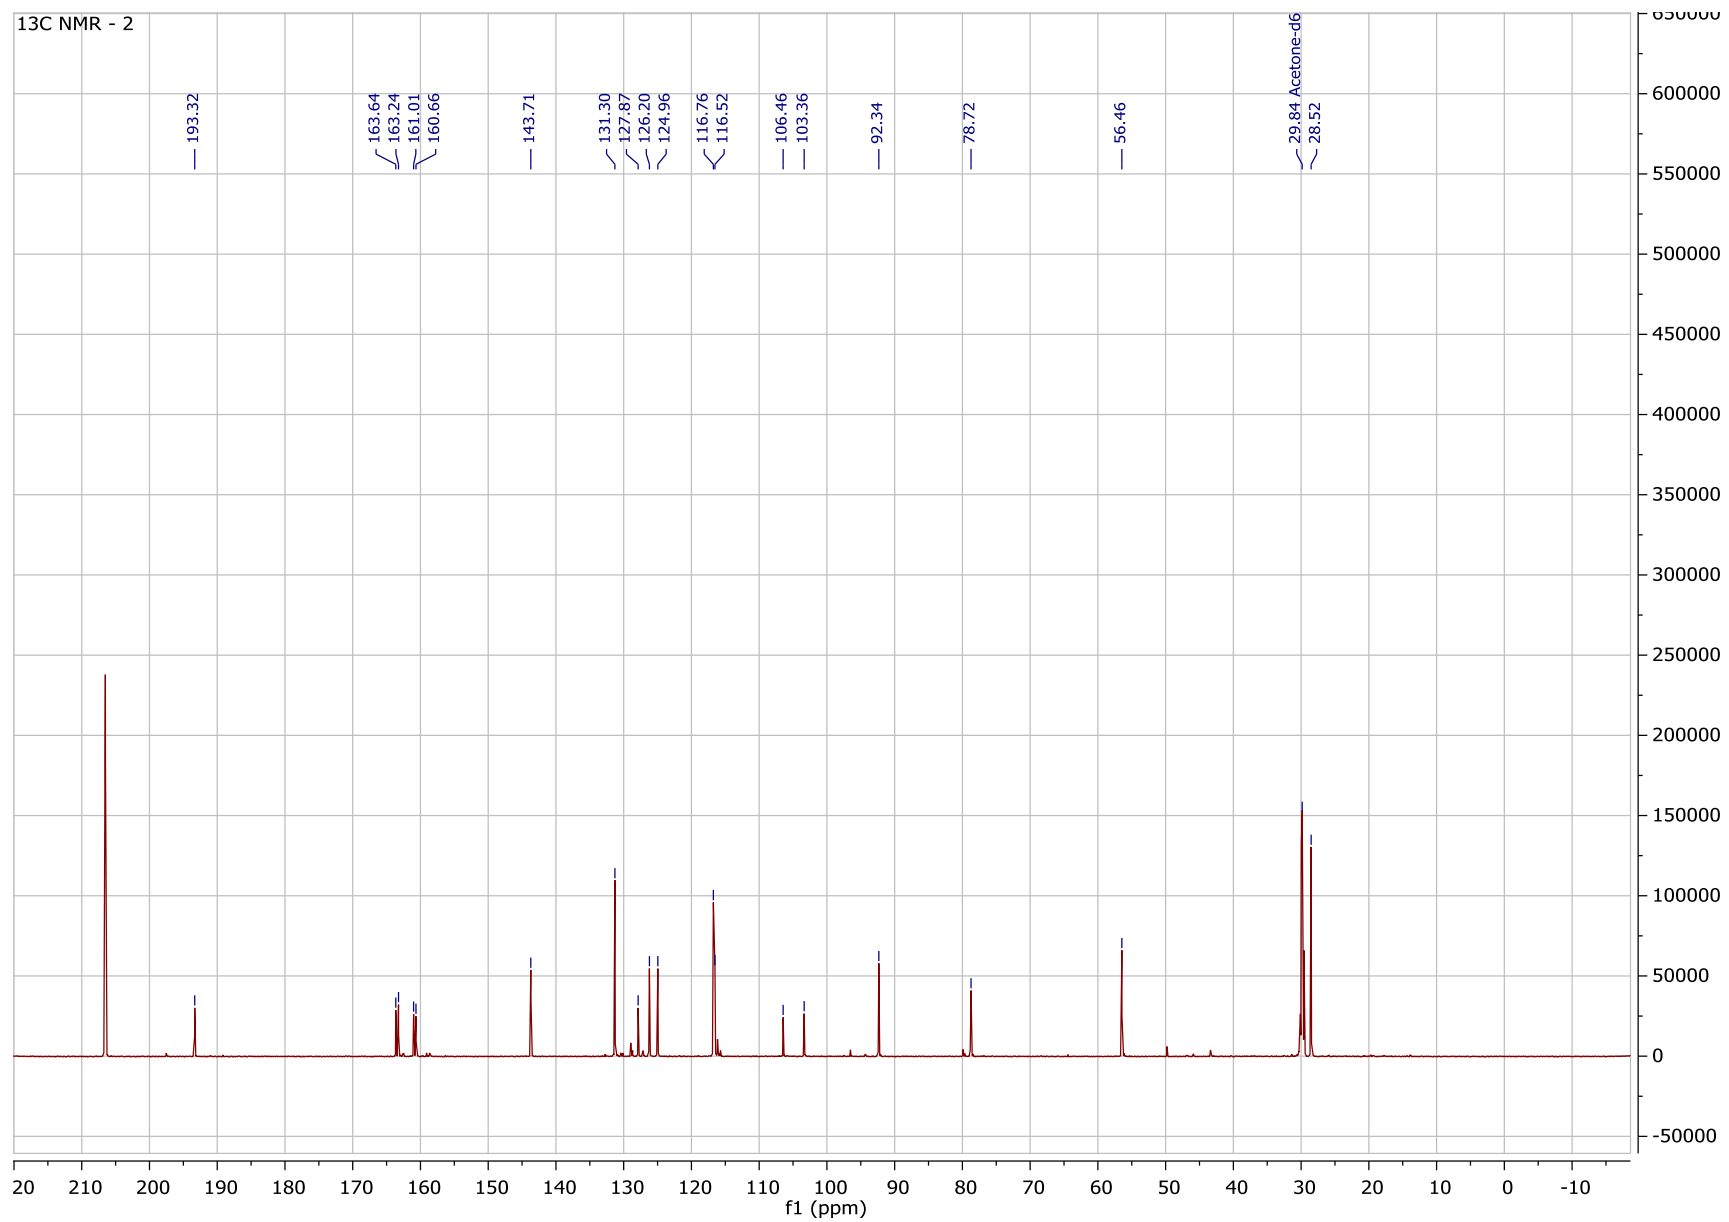

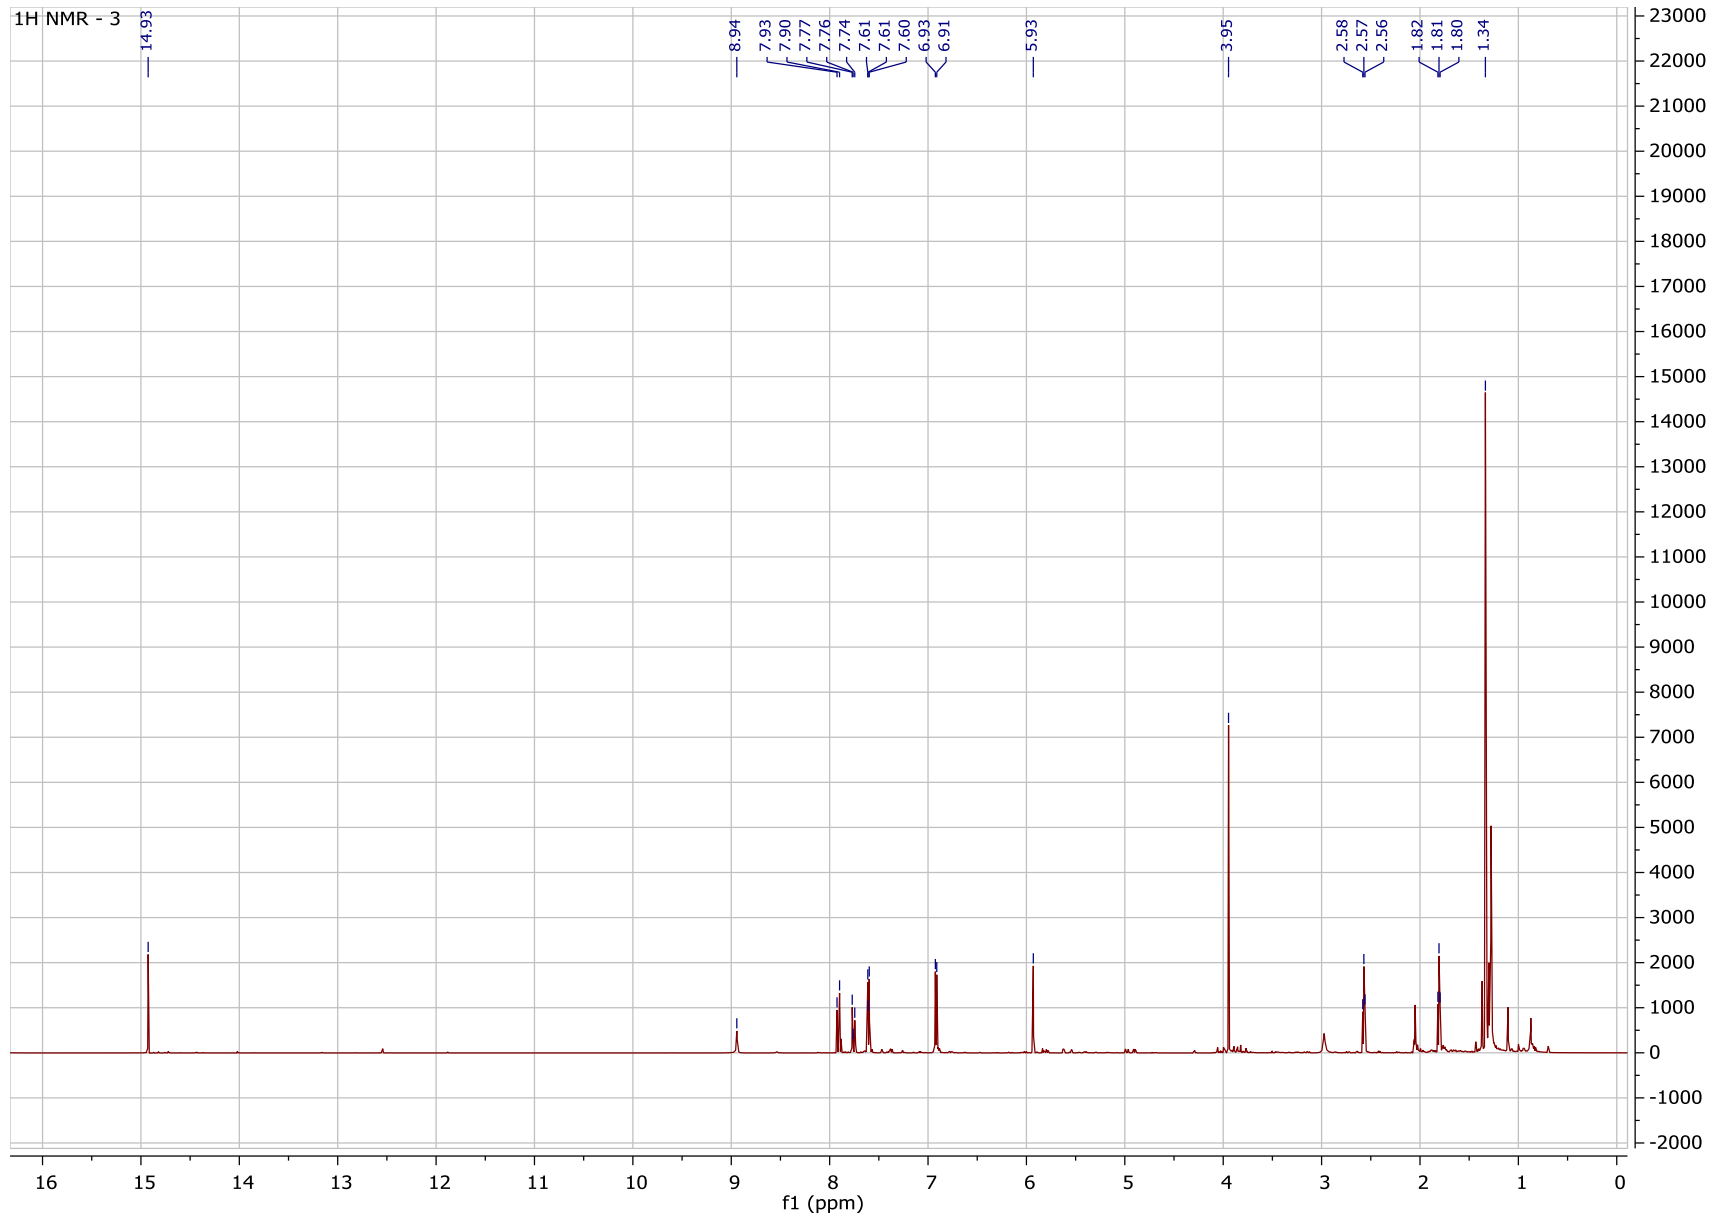

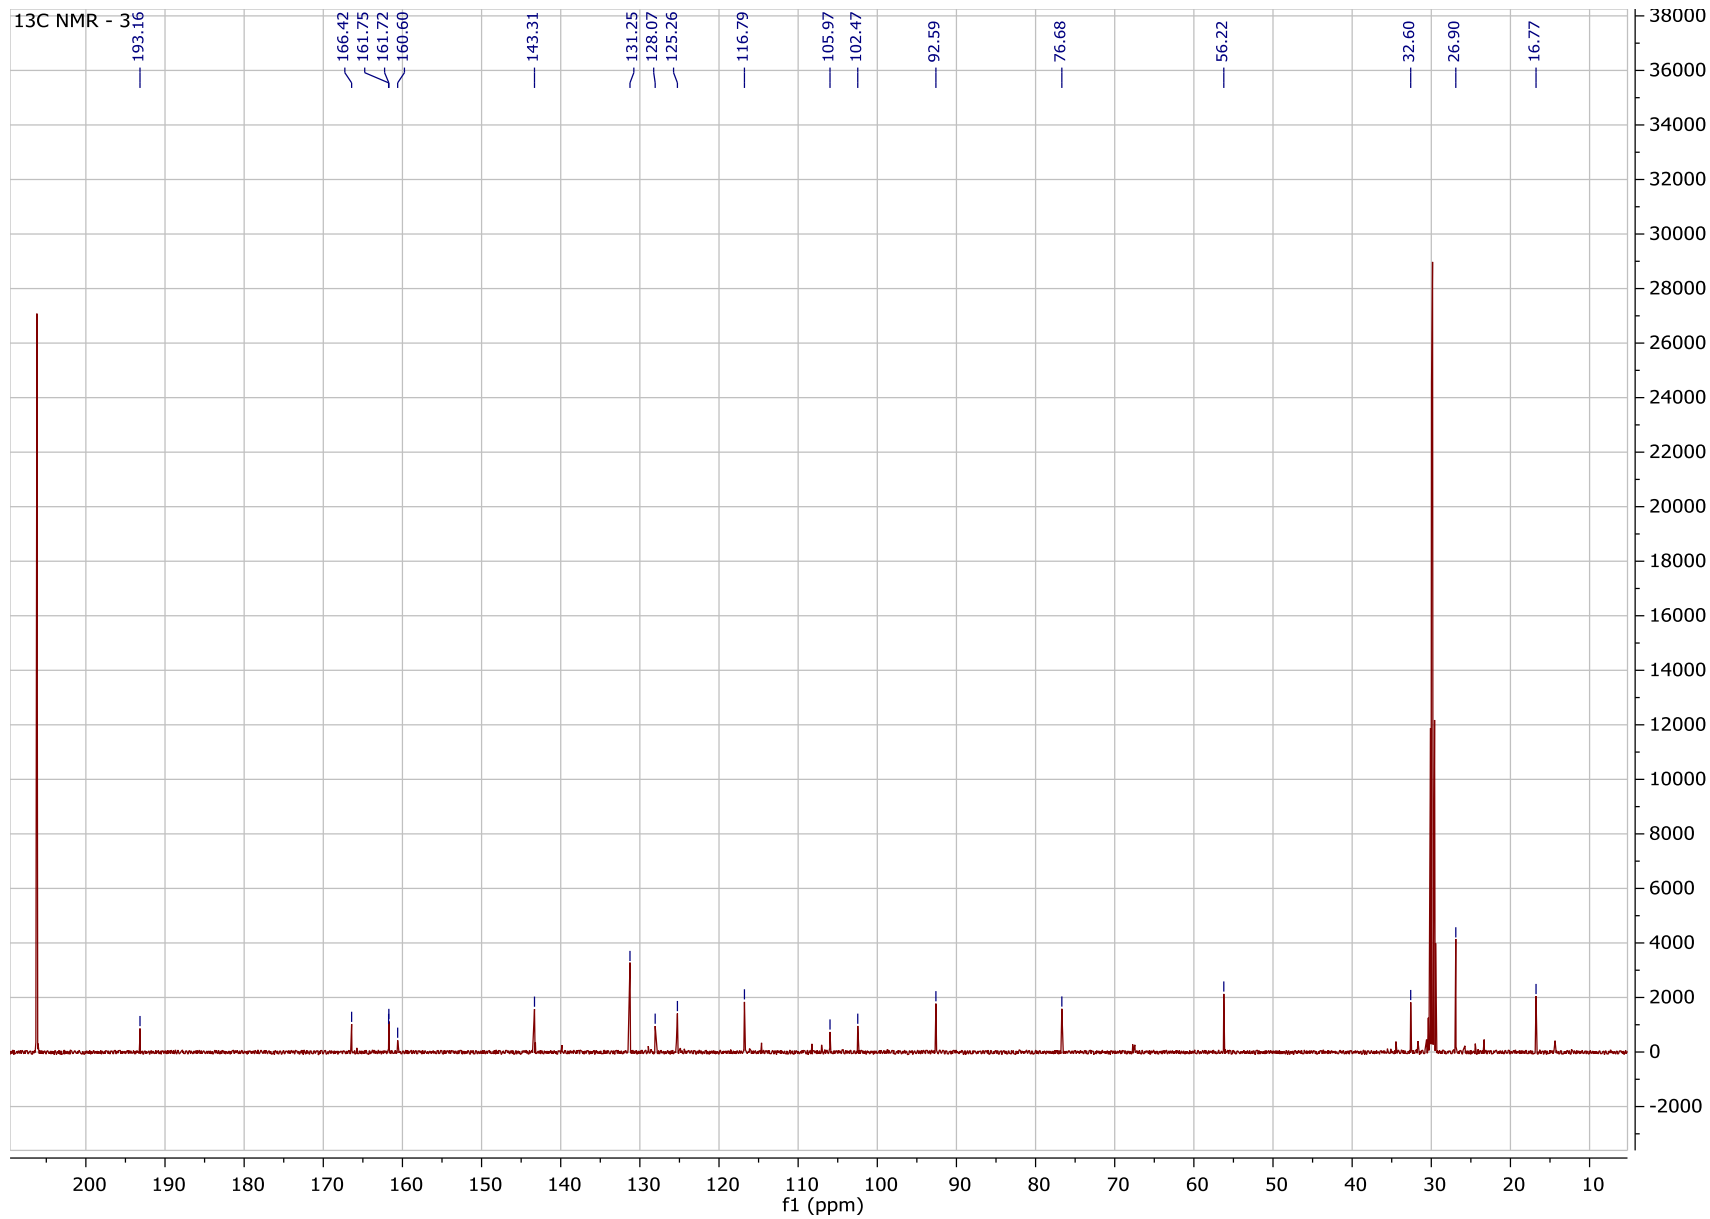

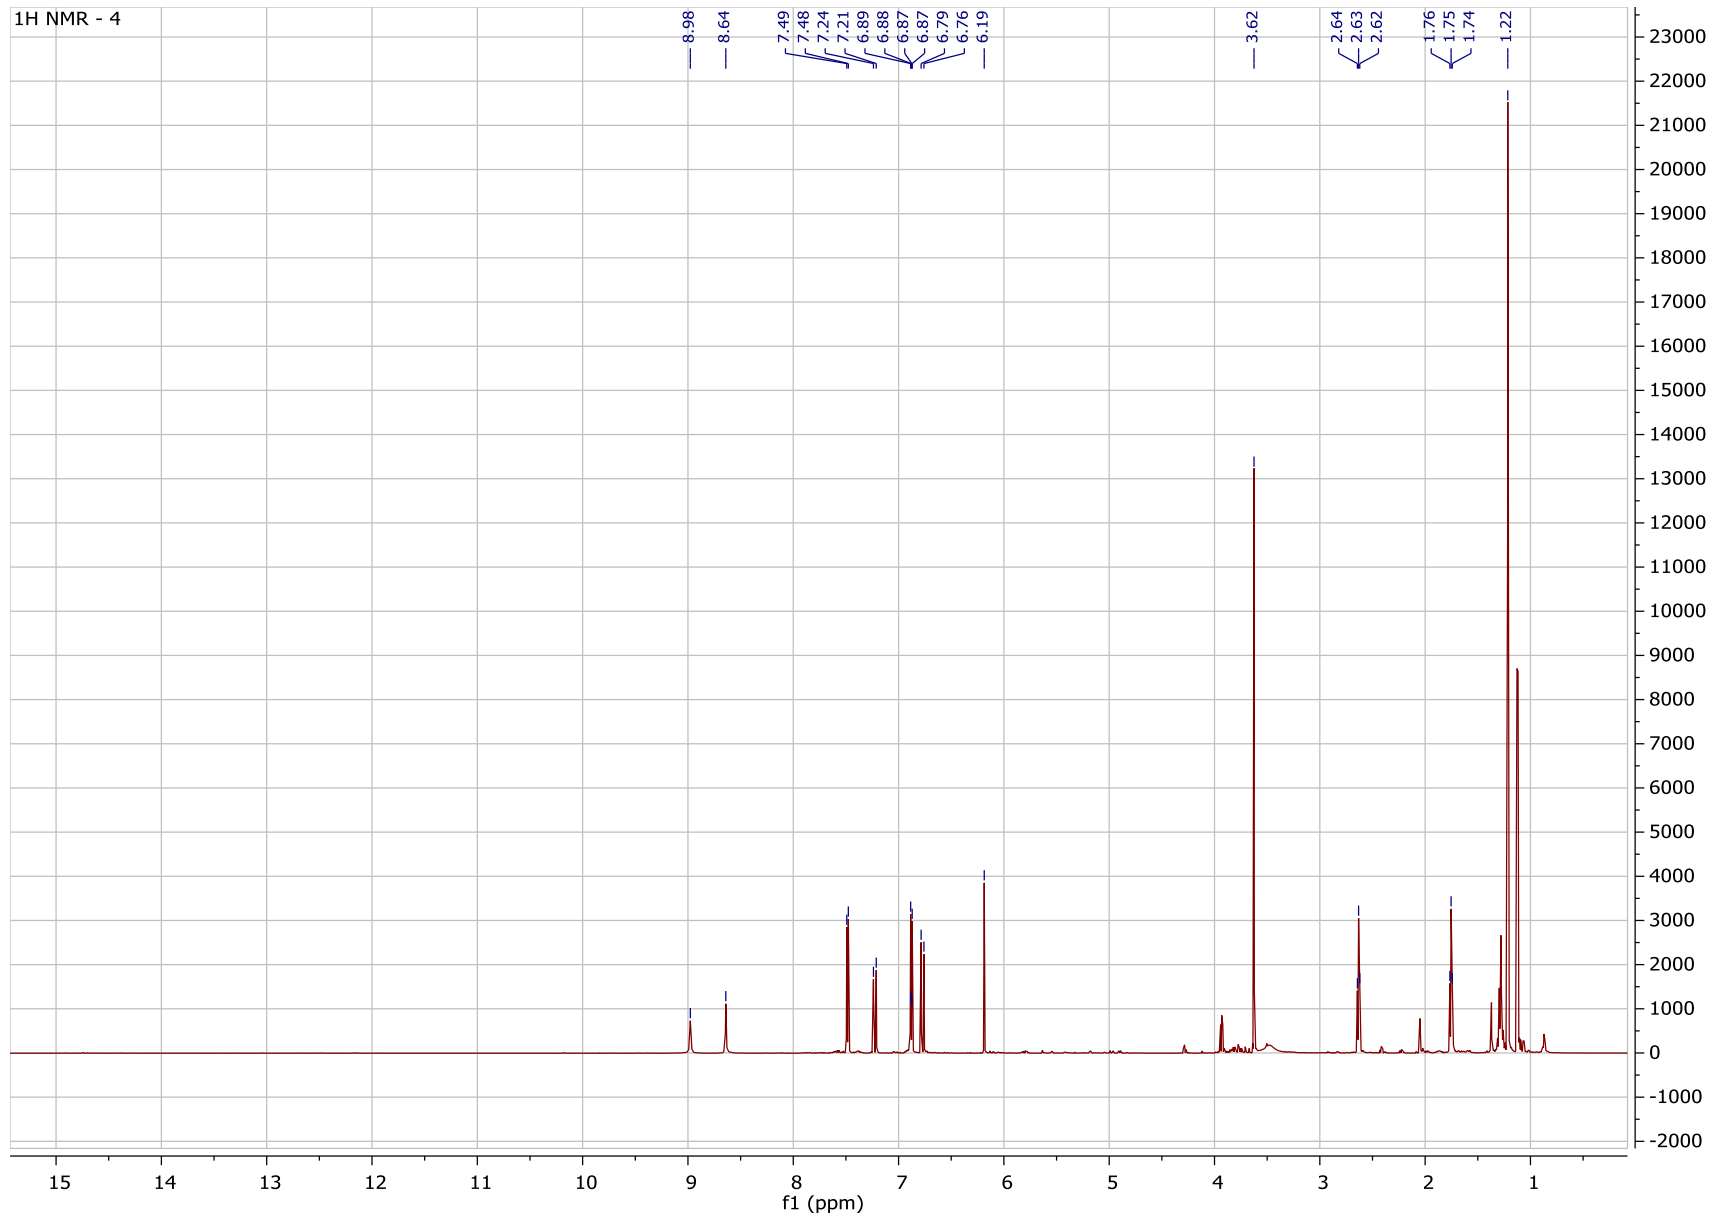

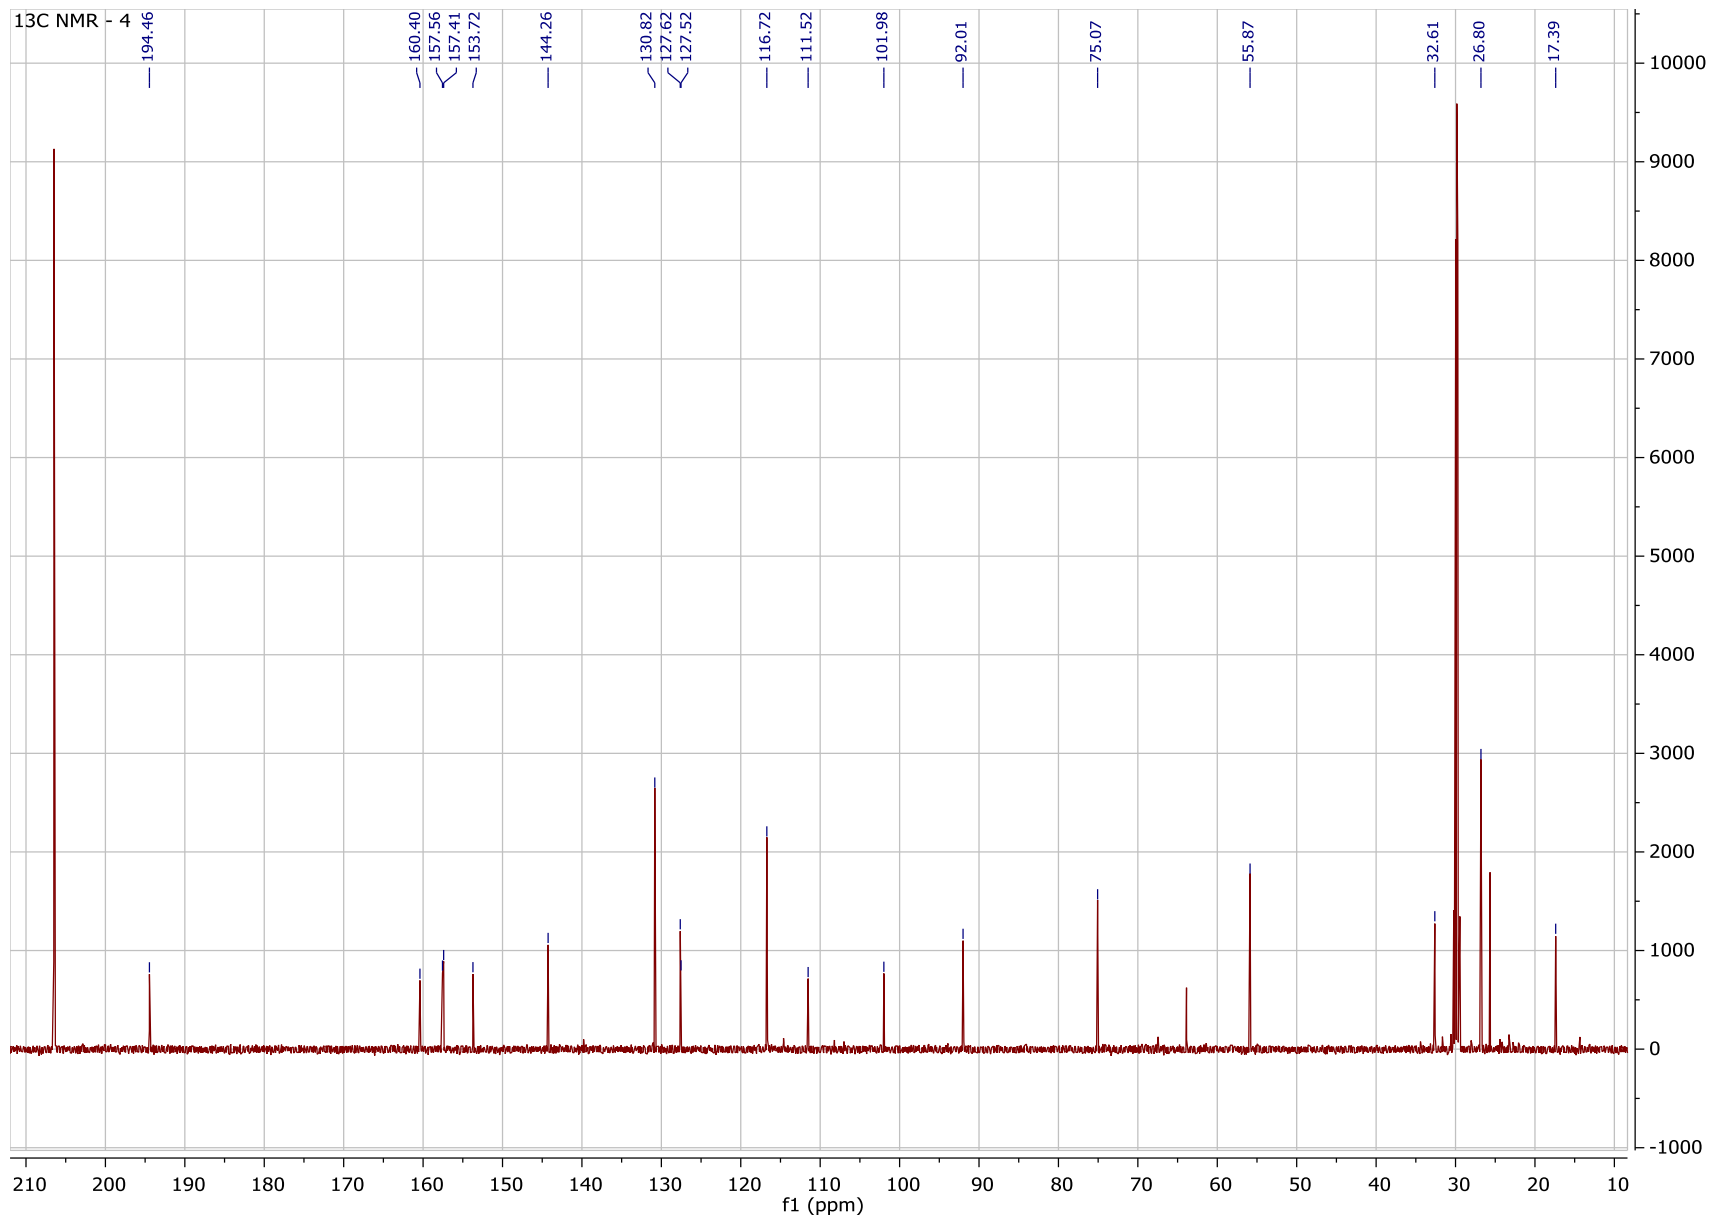

1H NMR - 6

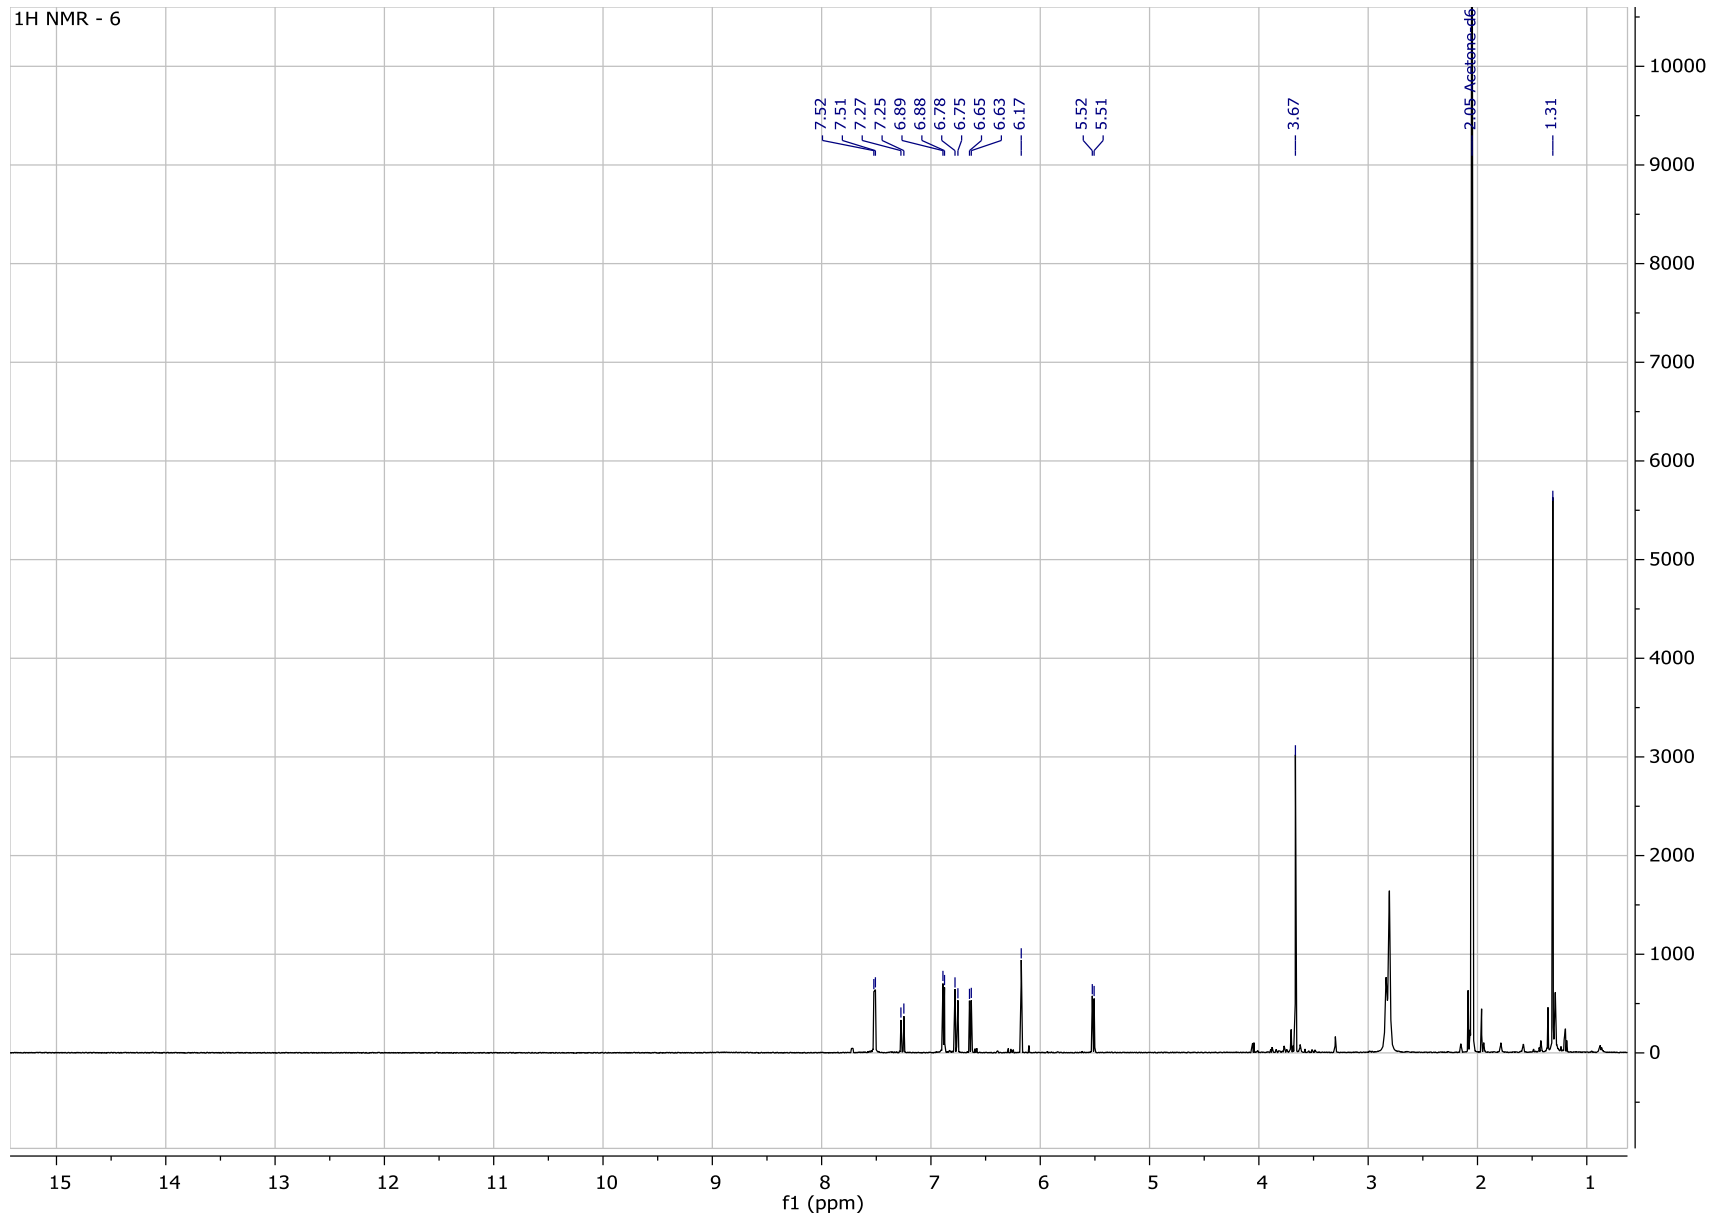



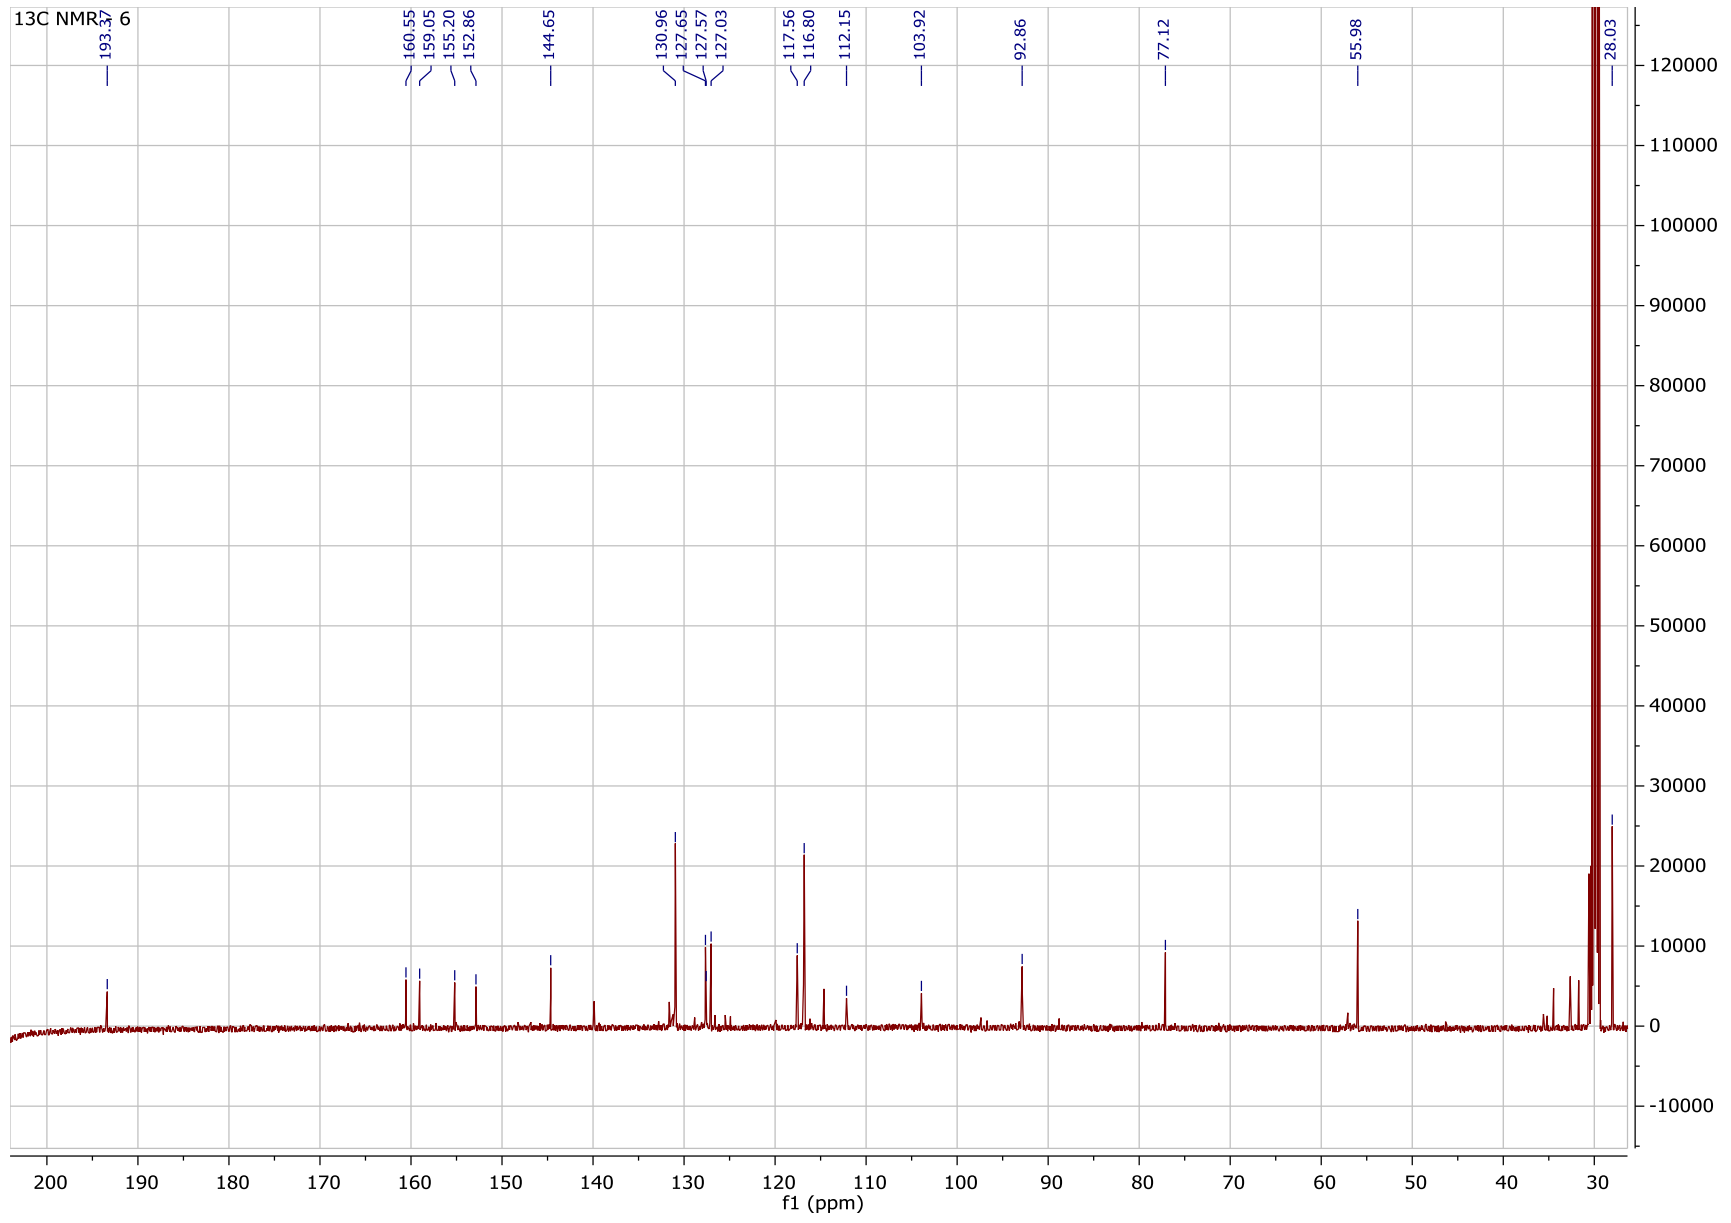

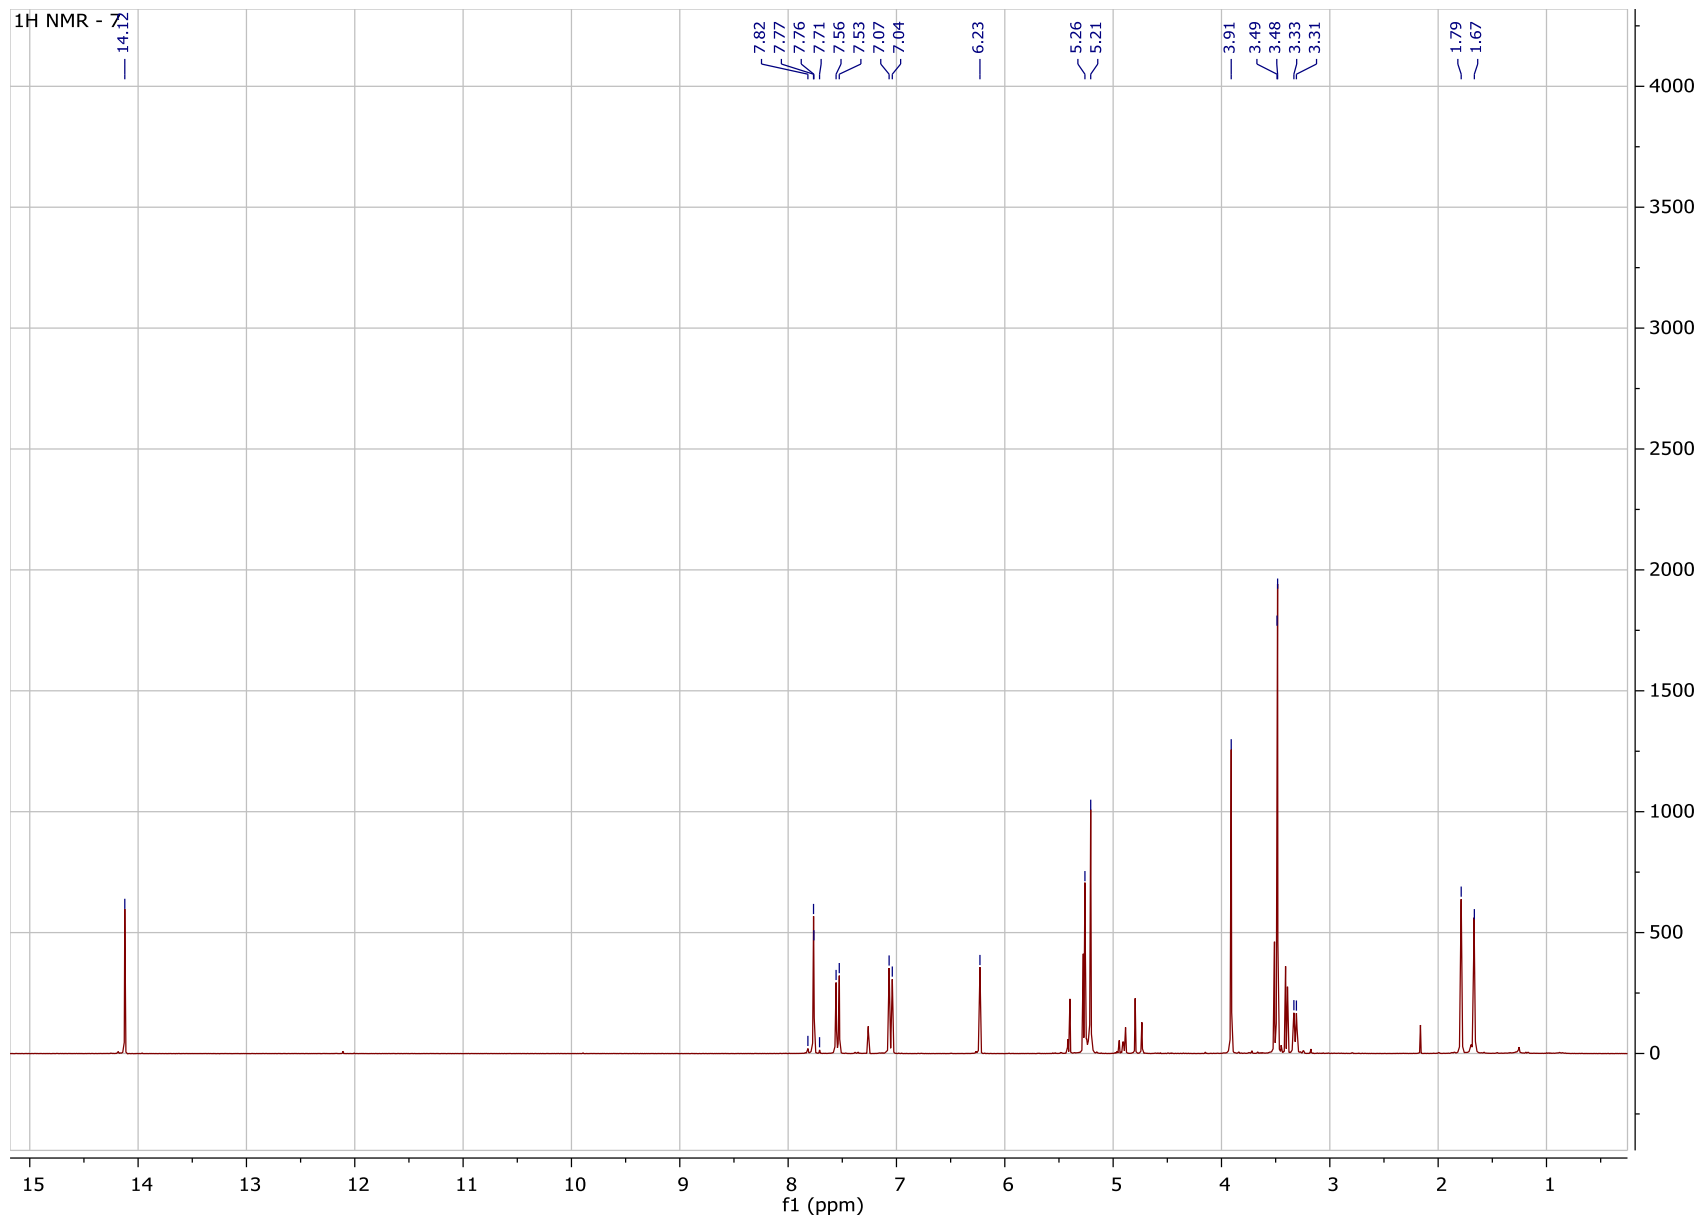

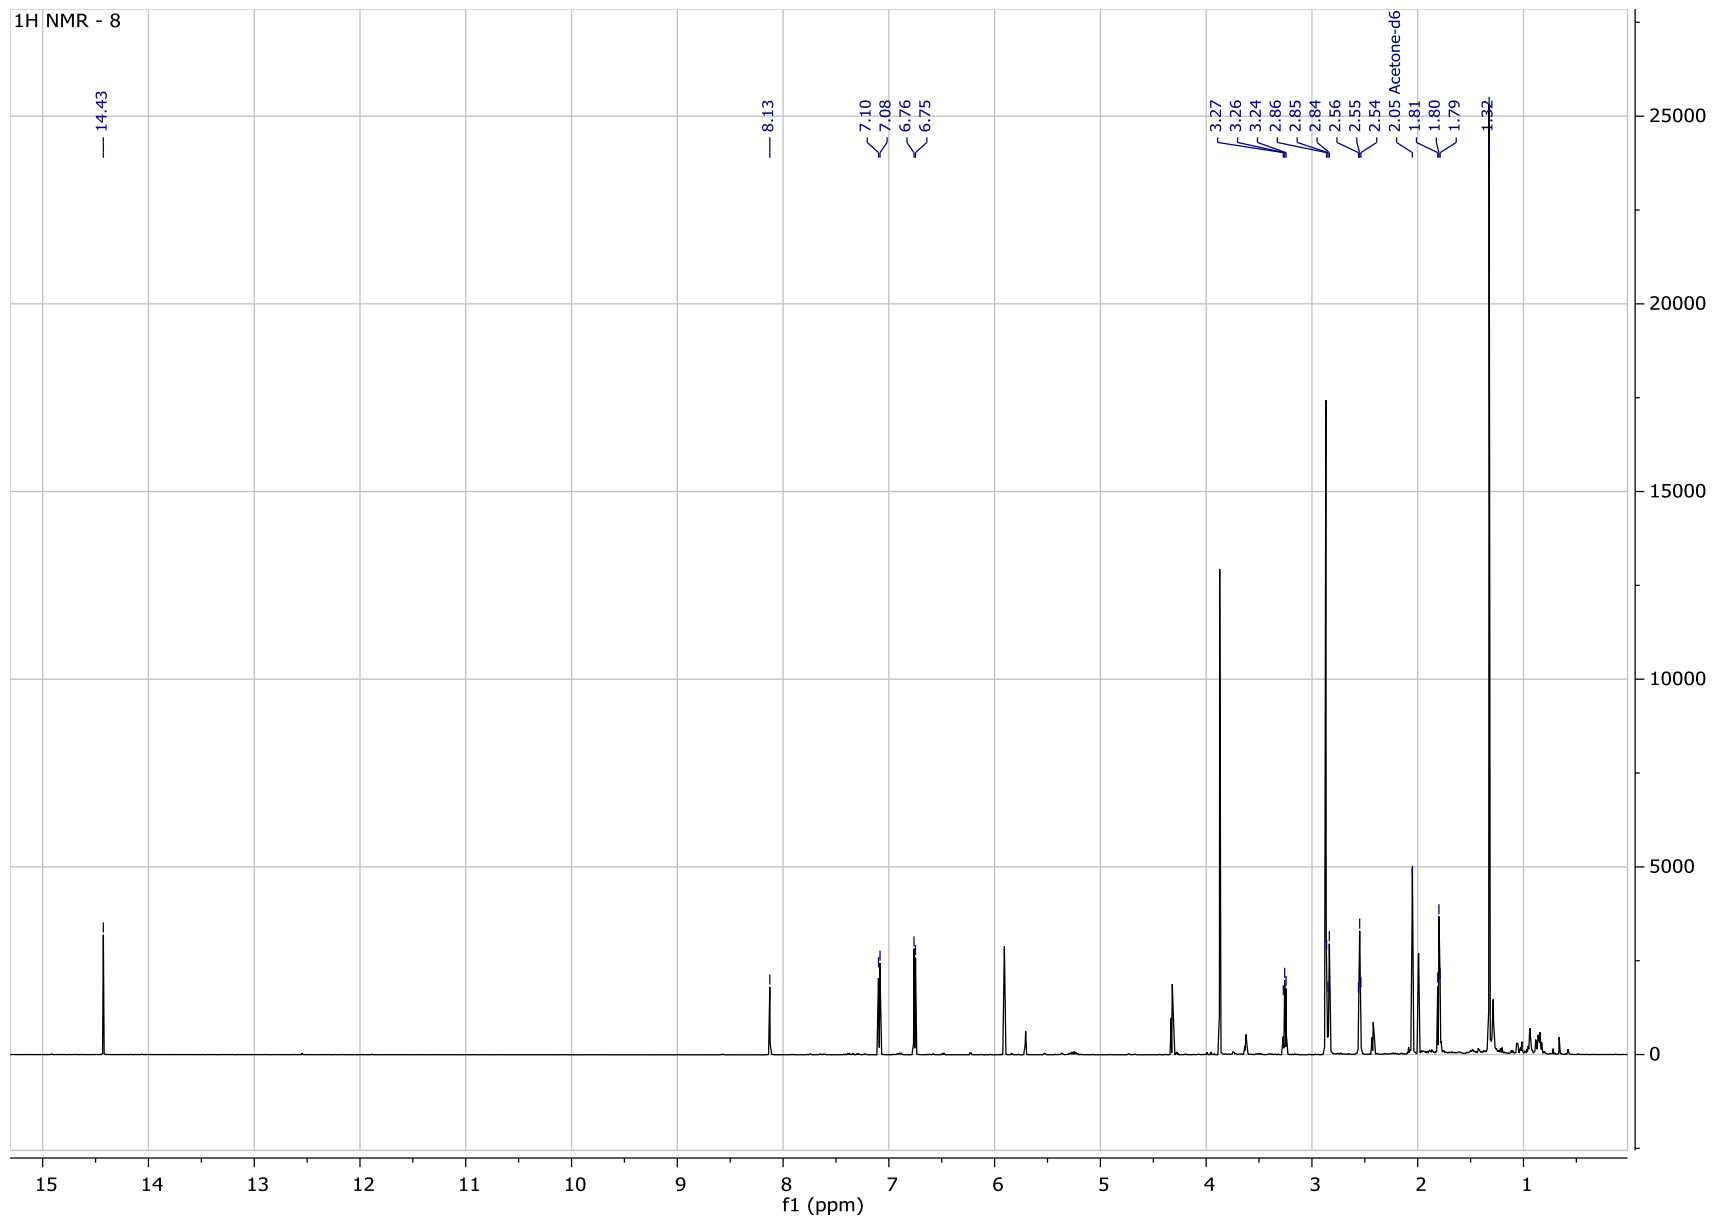

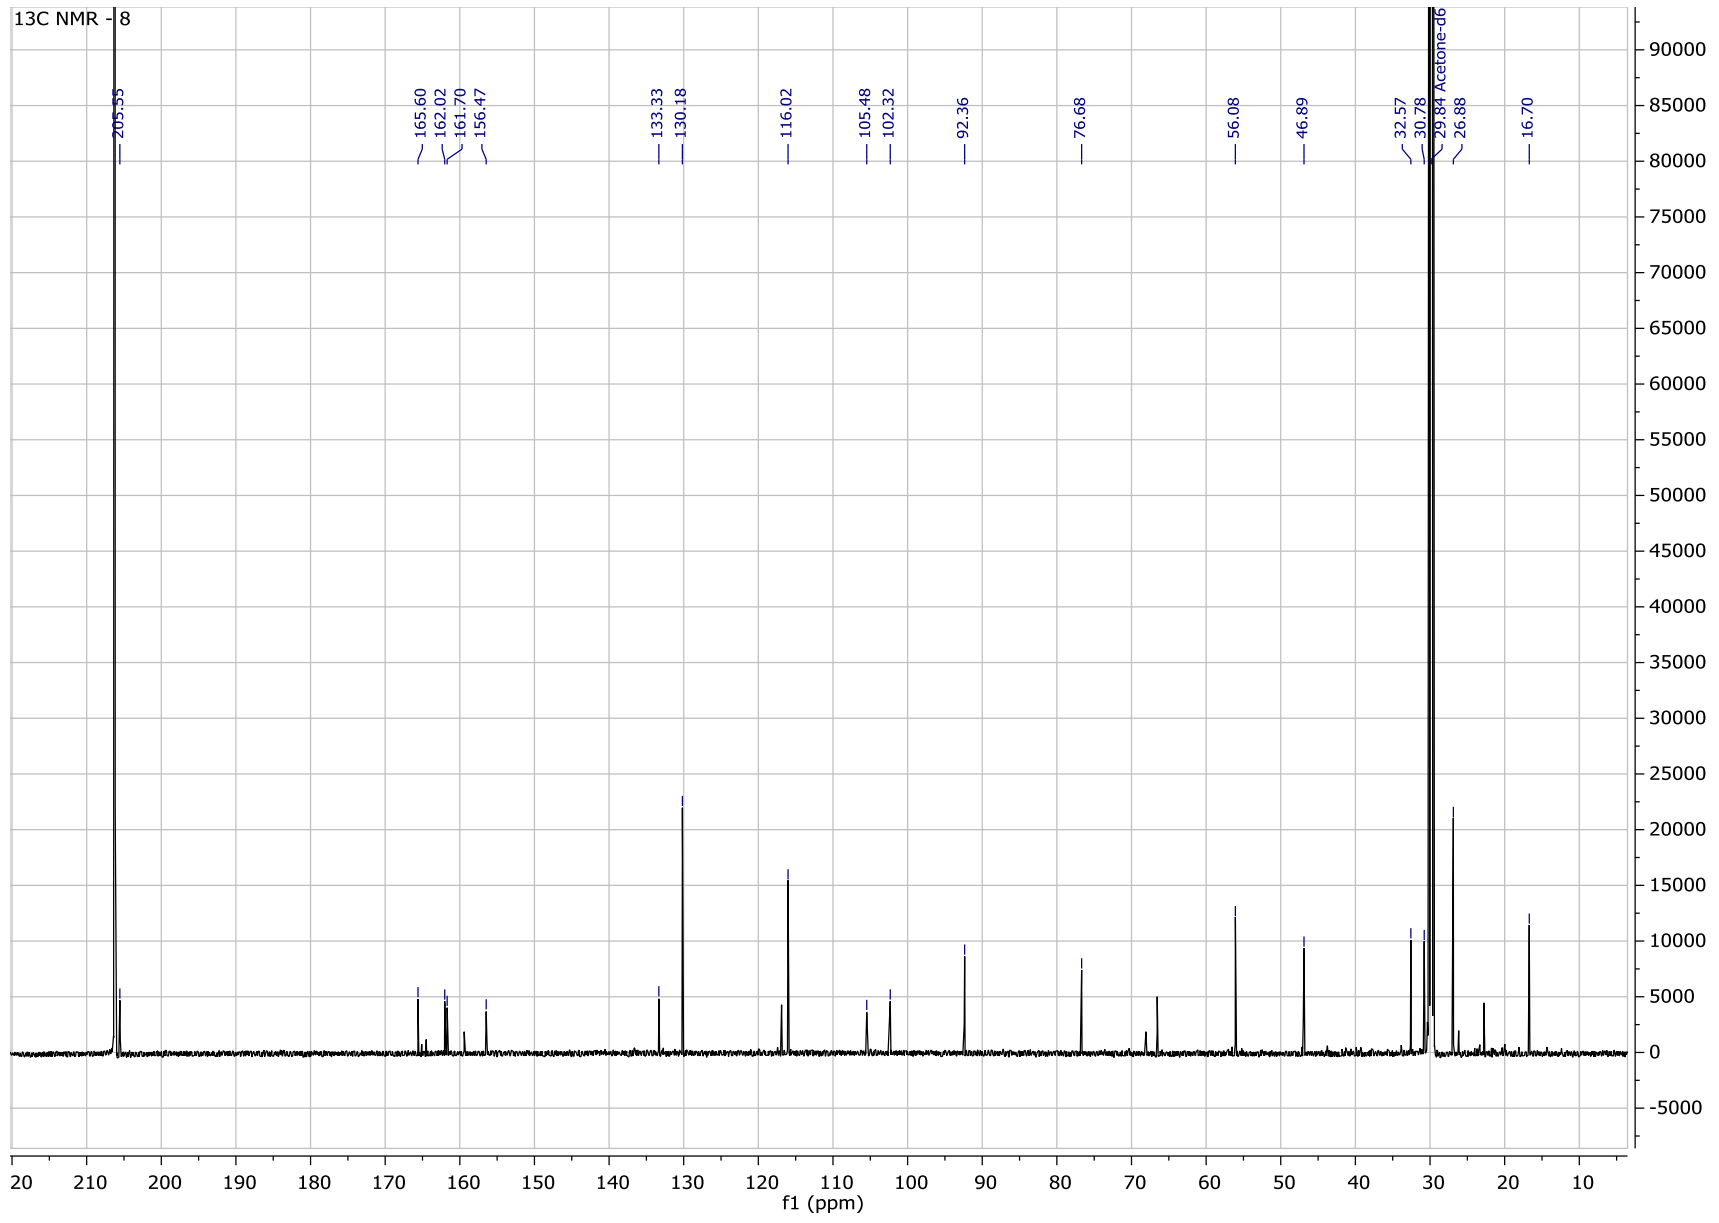

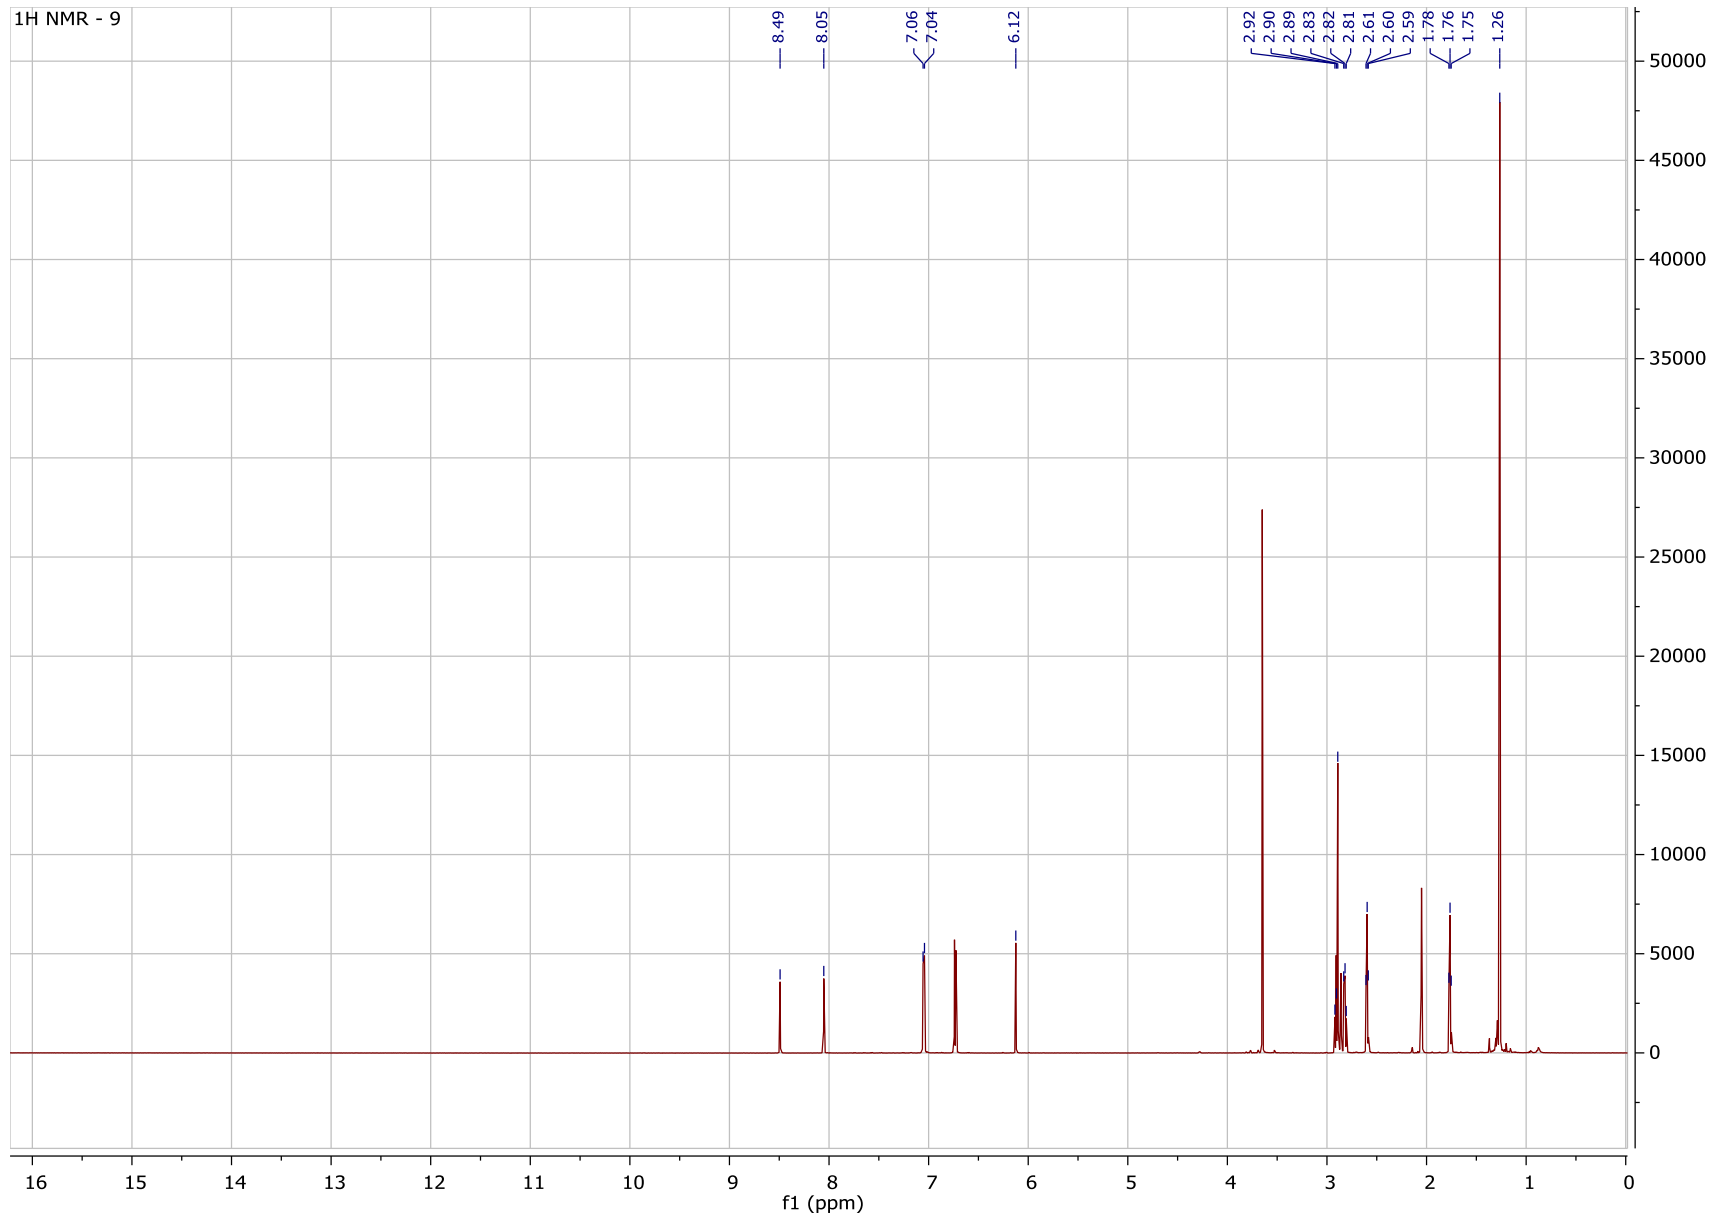

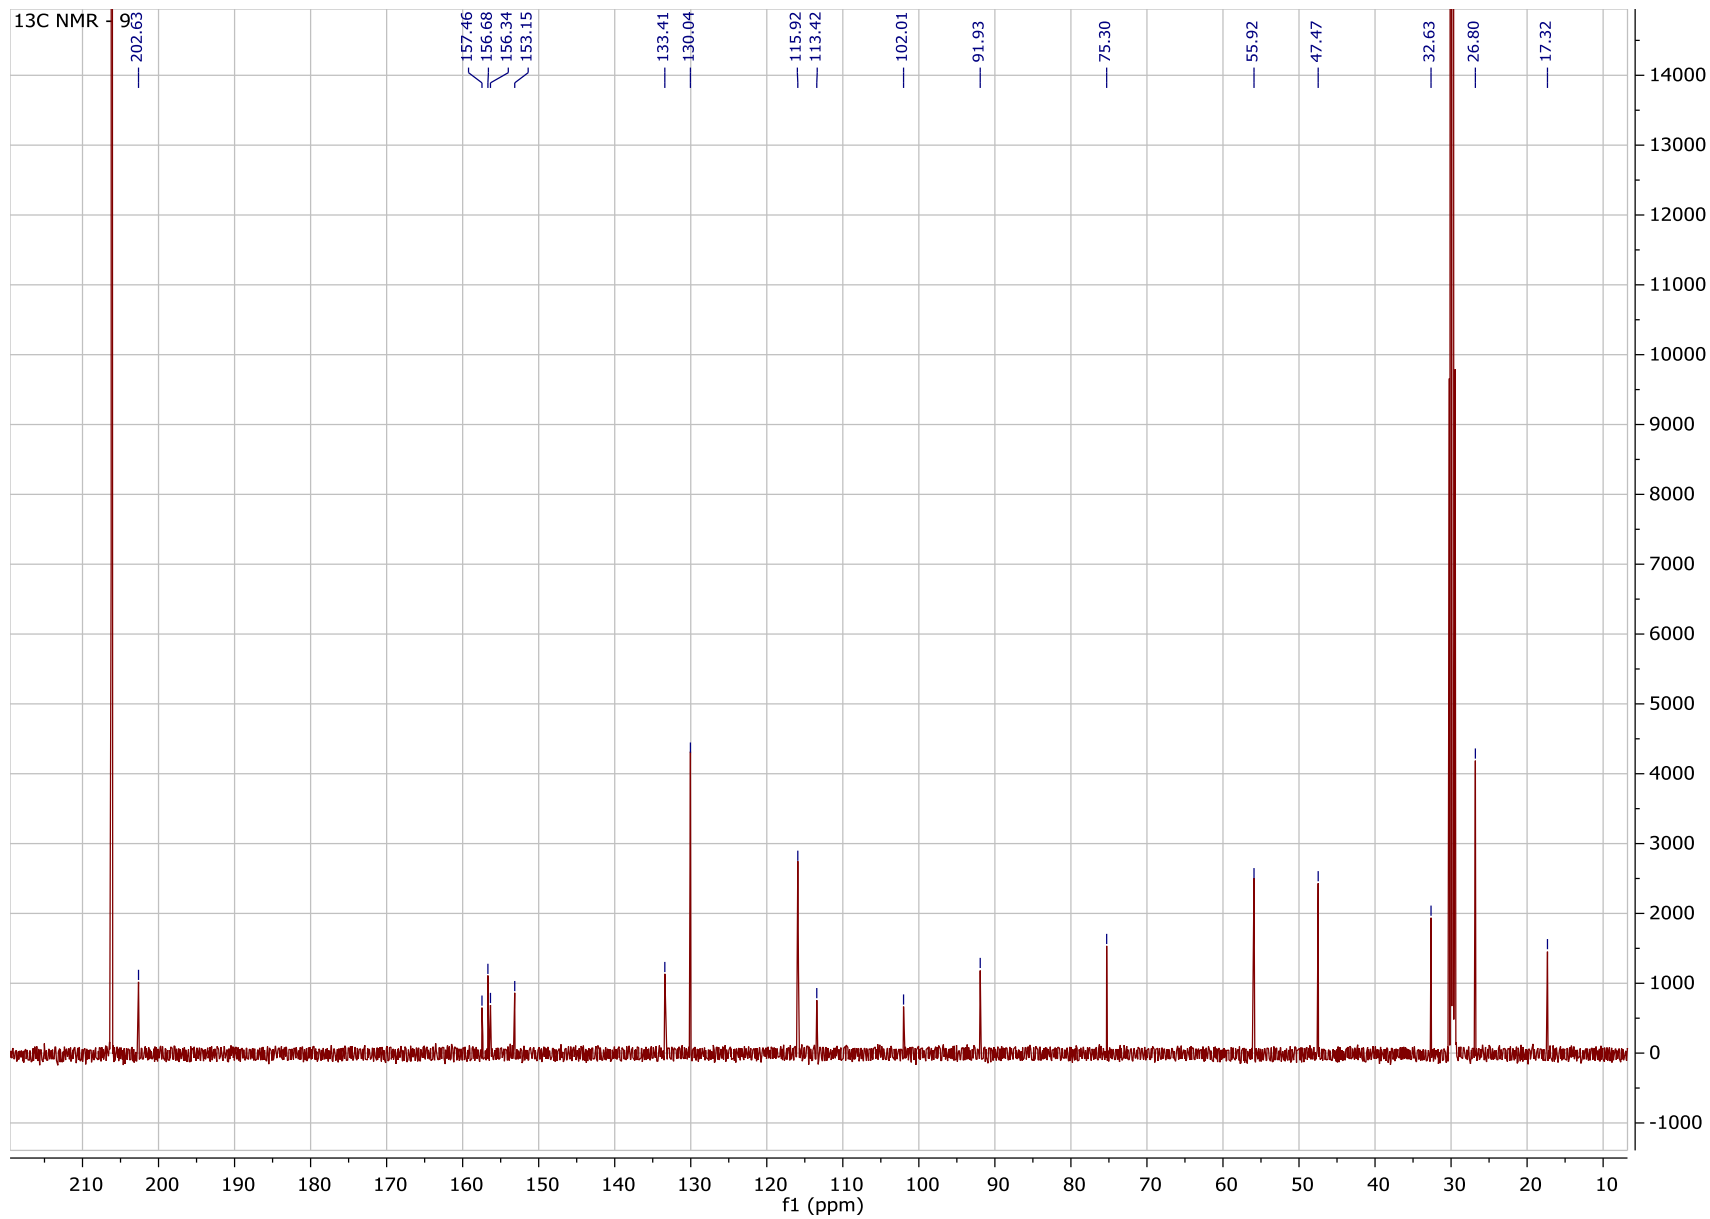

1H NMR - 10

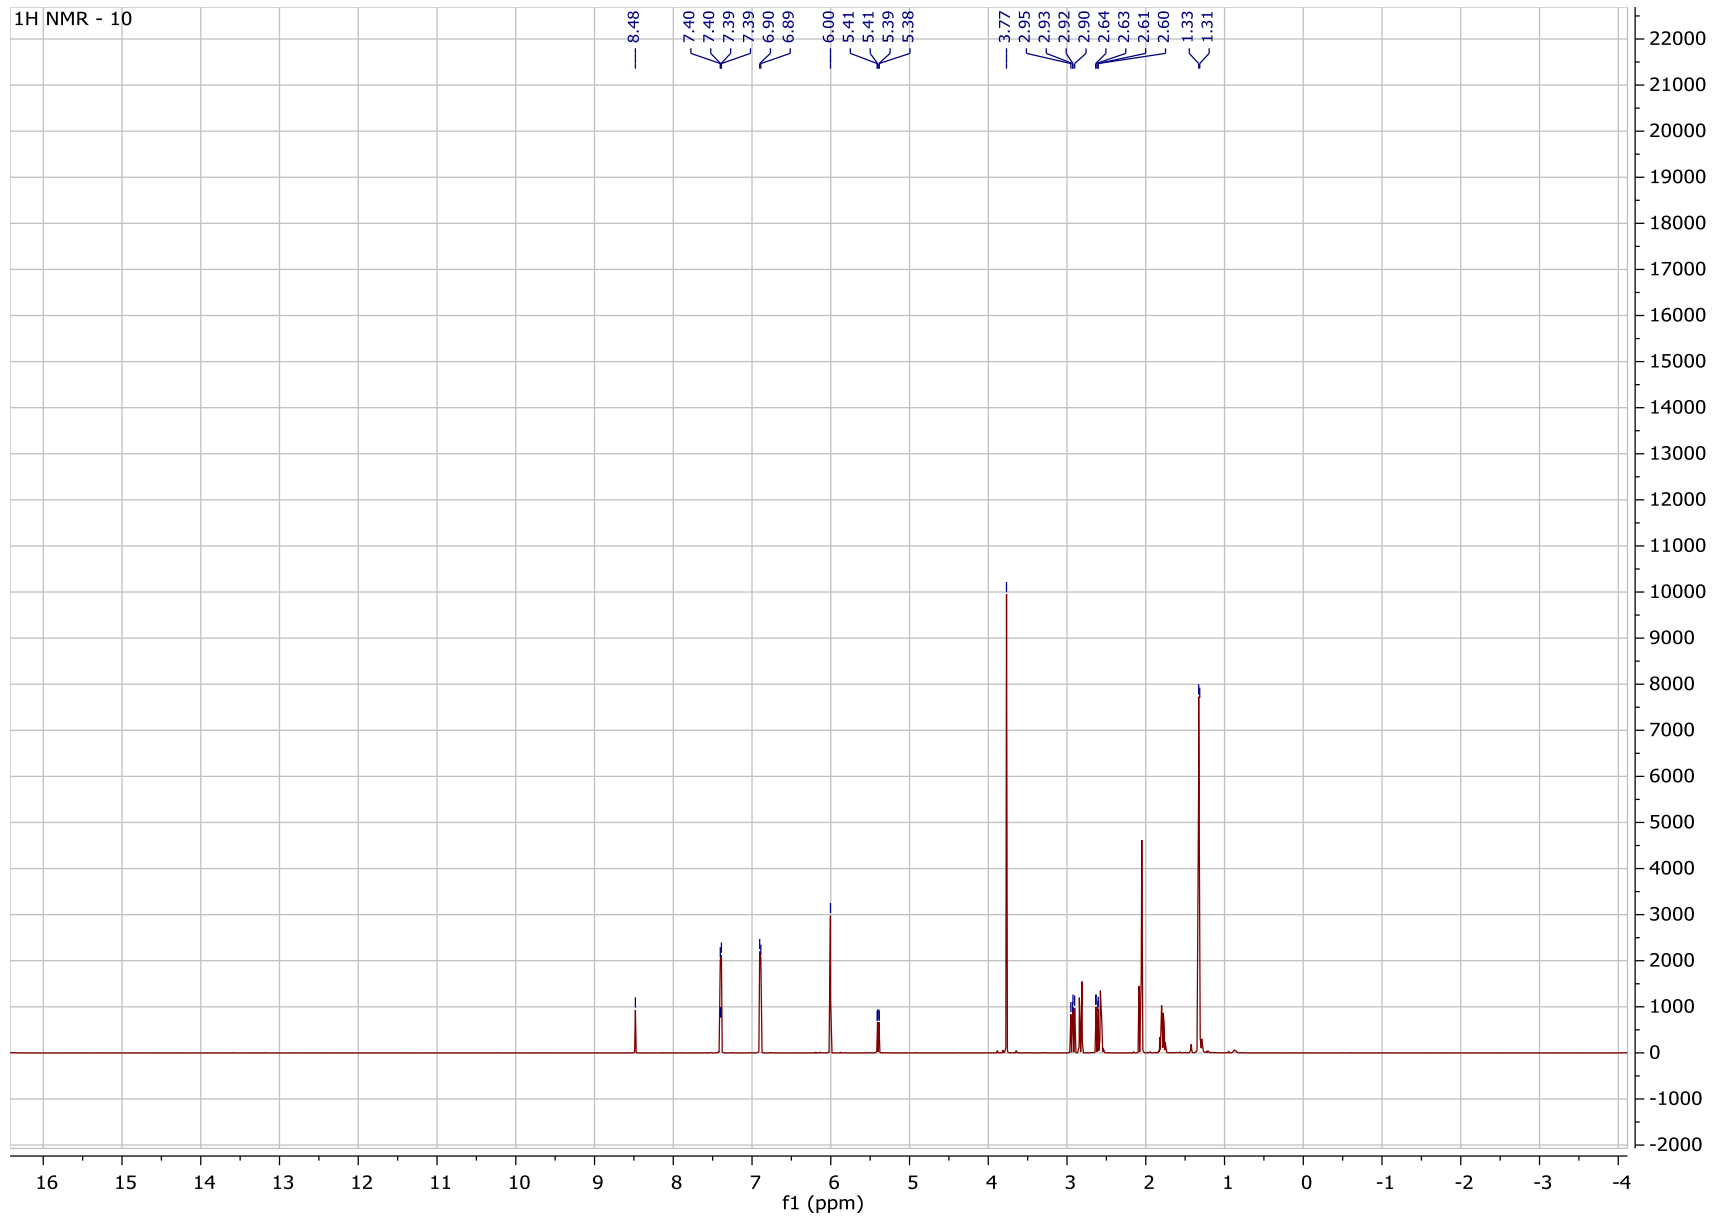

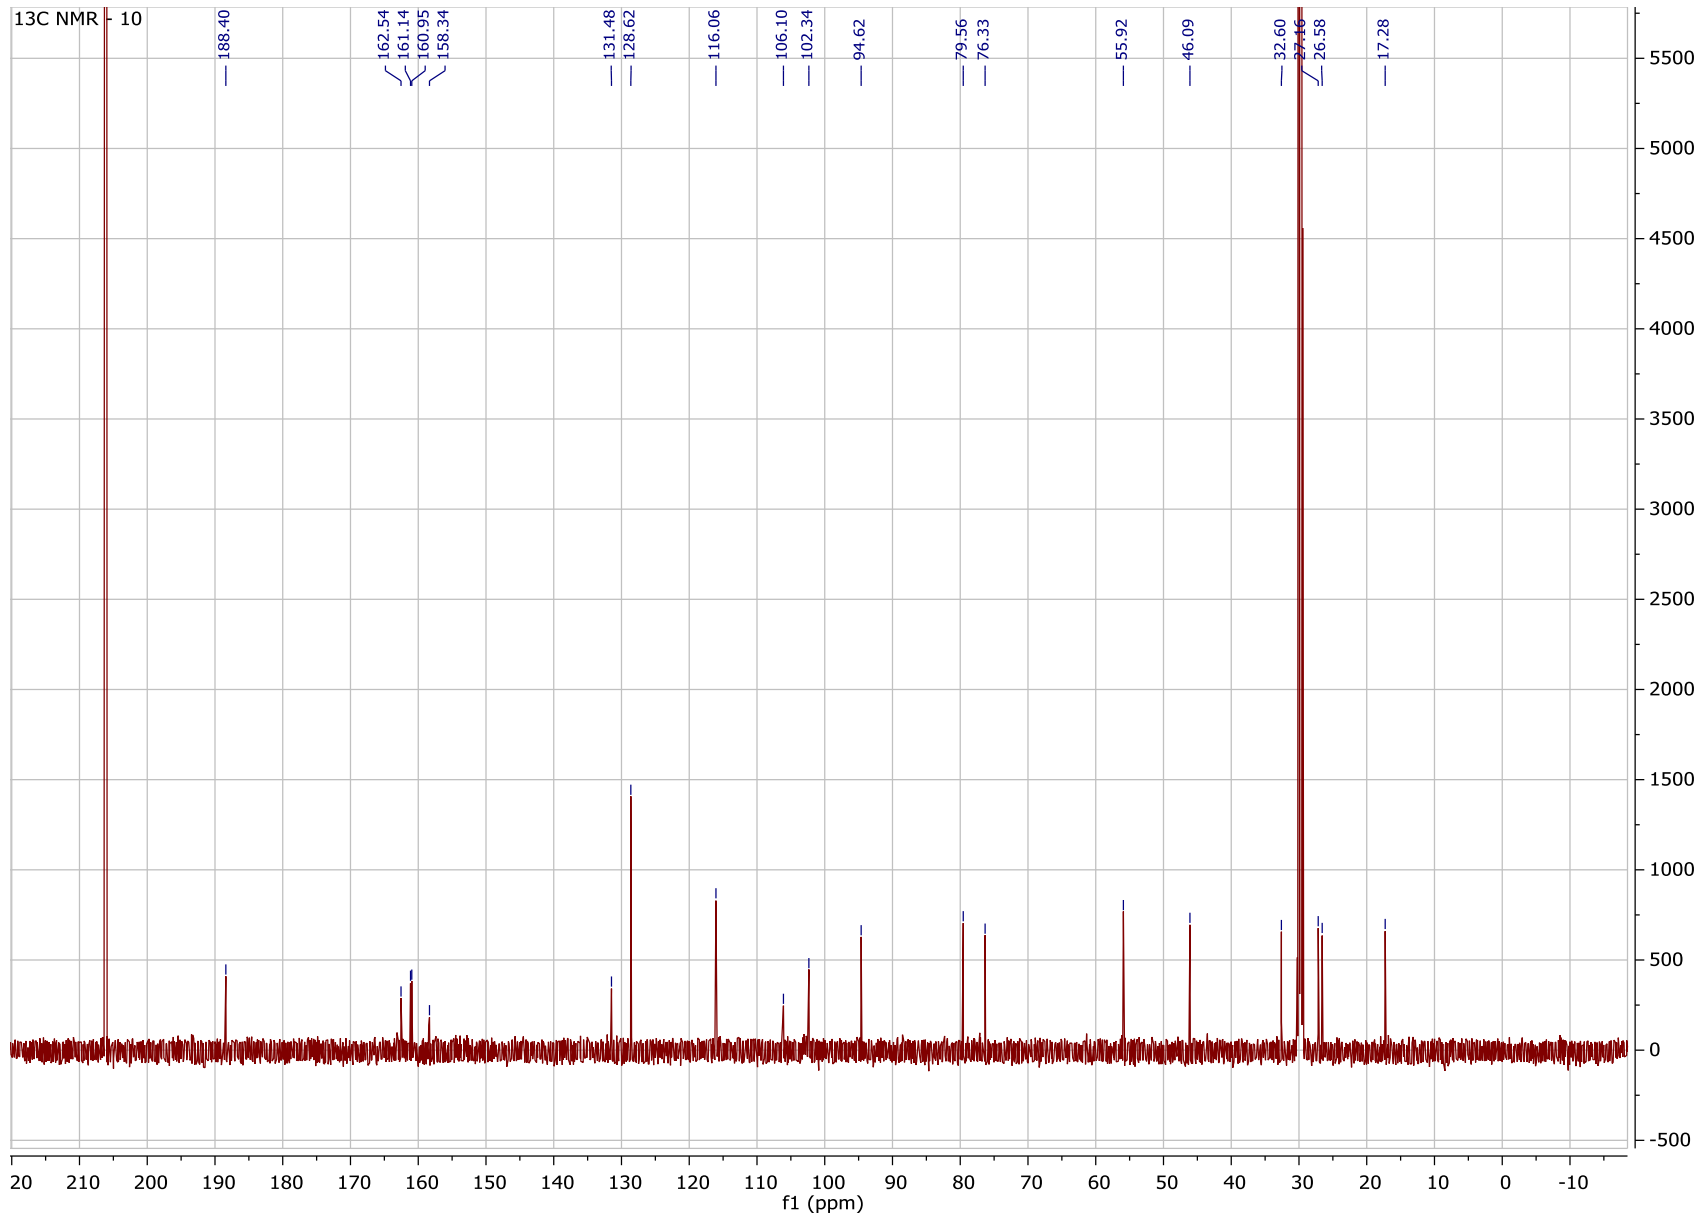



1H NMR - 11a/11b

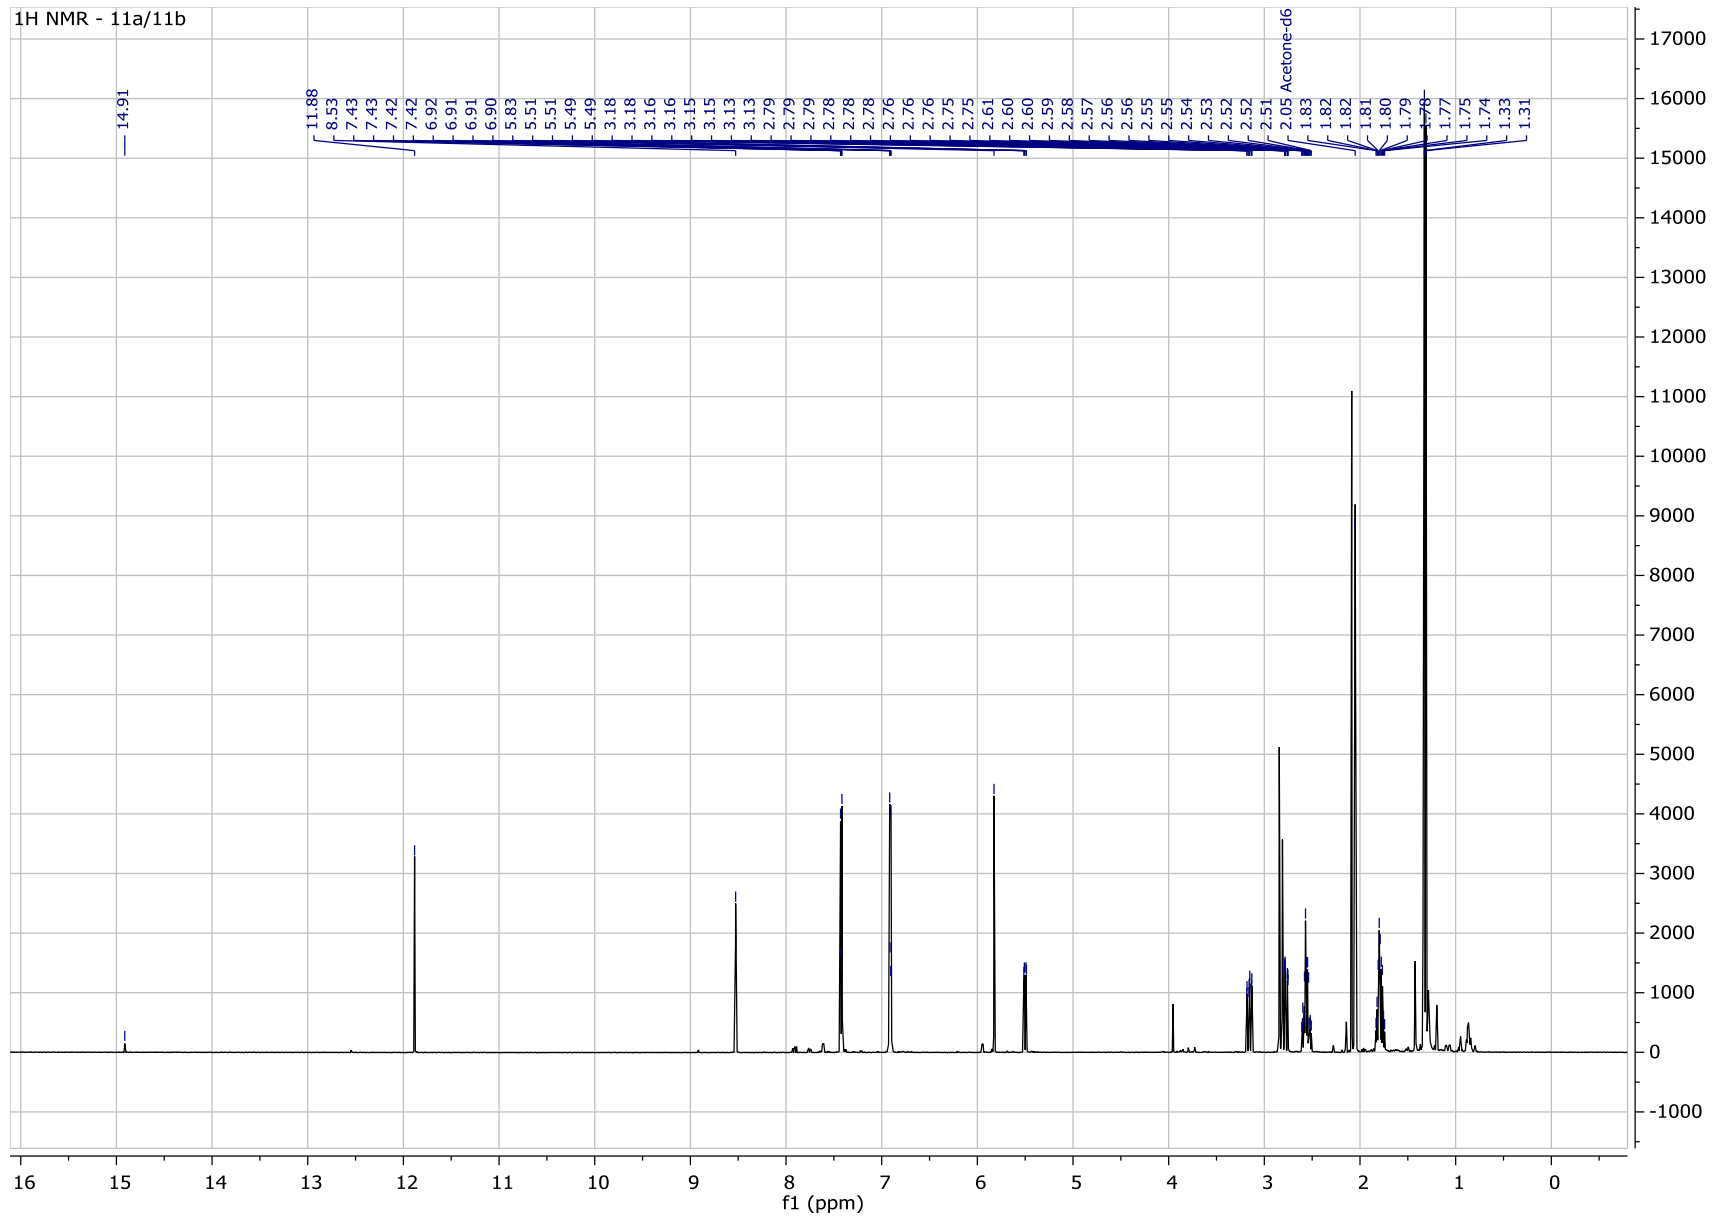

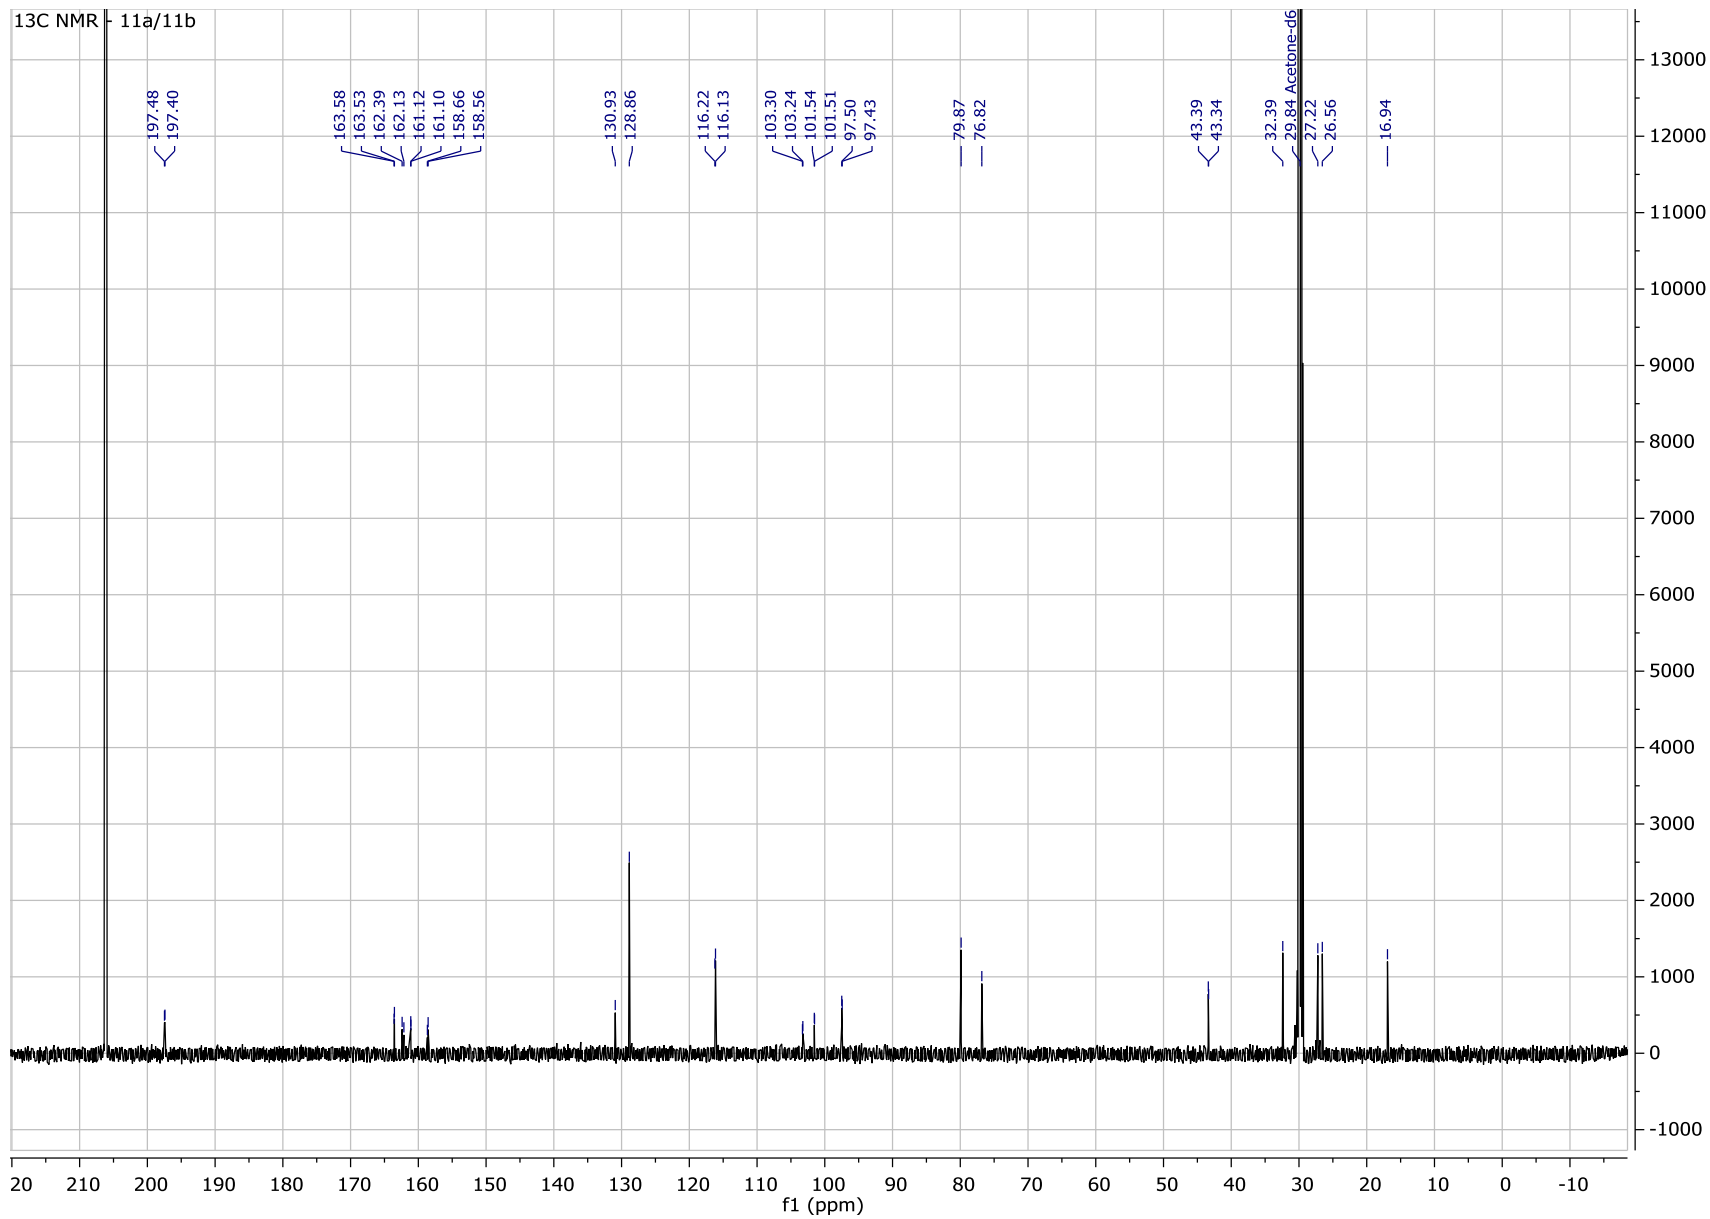

1H NMR - 12

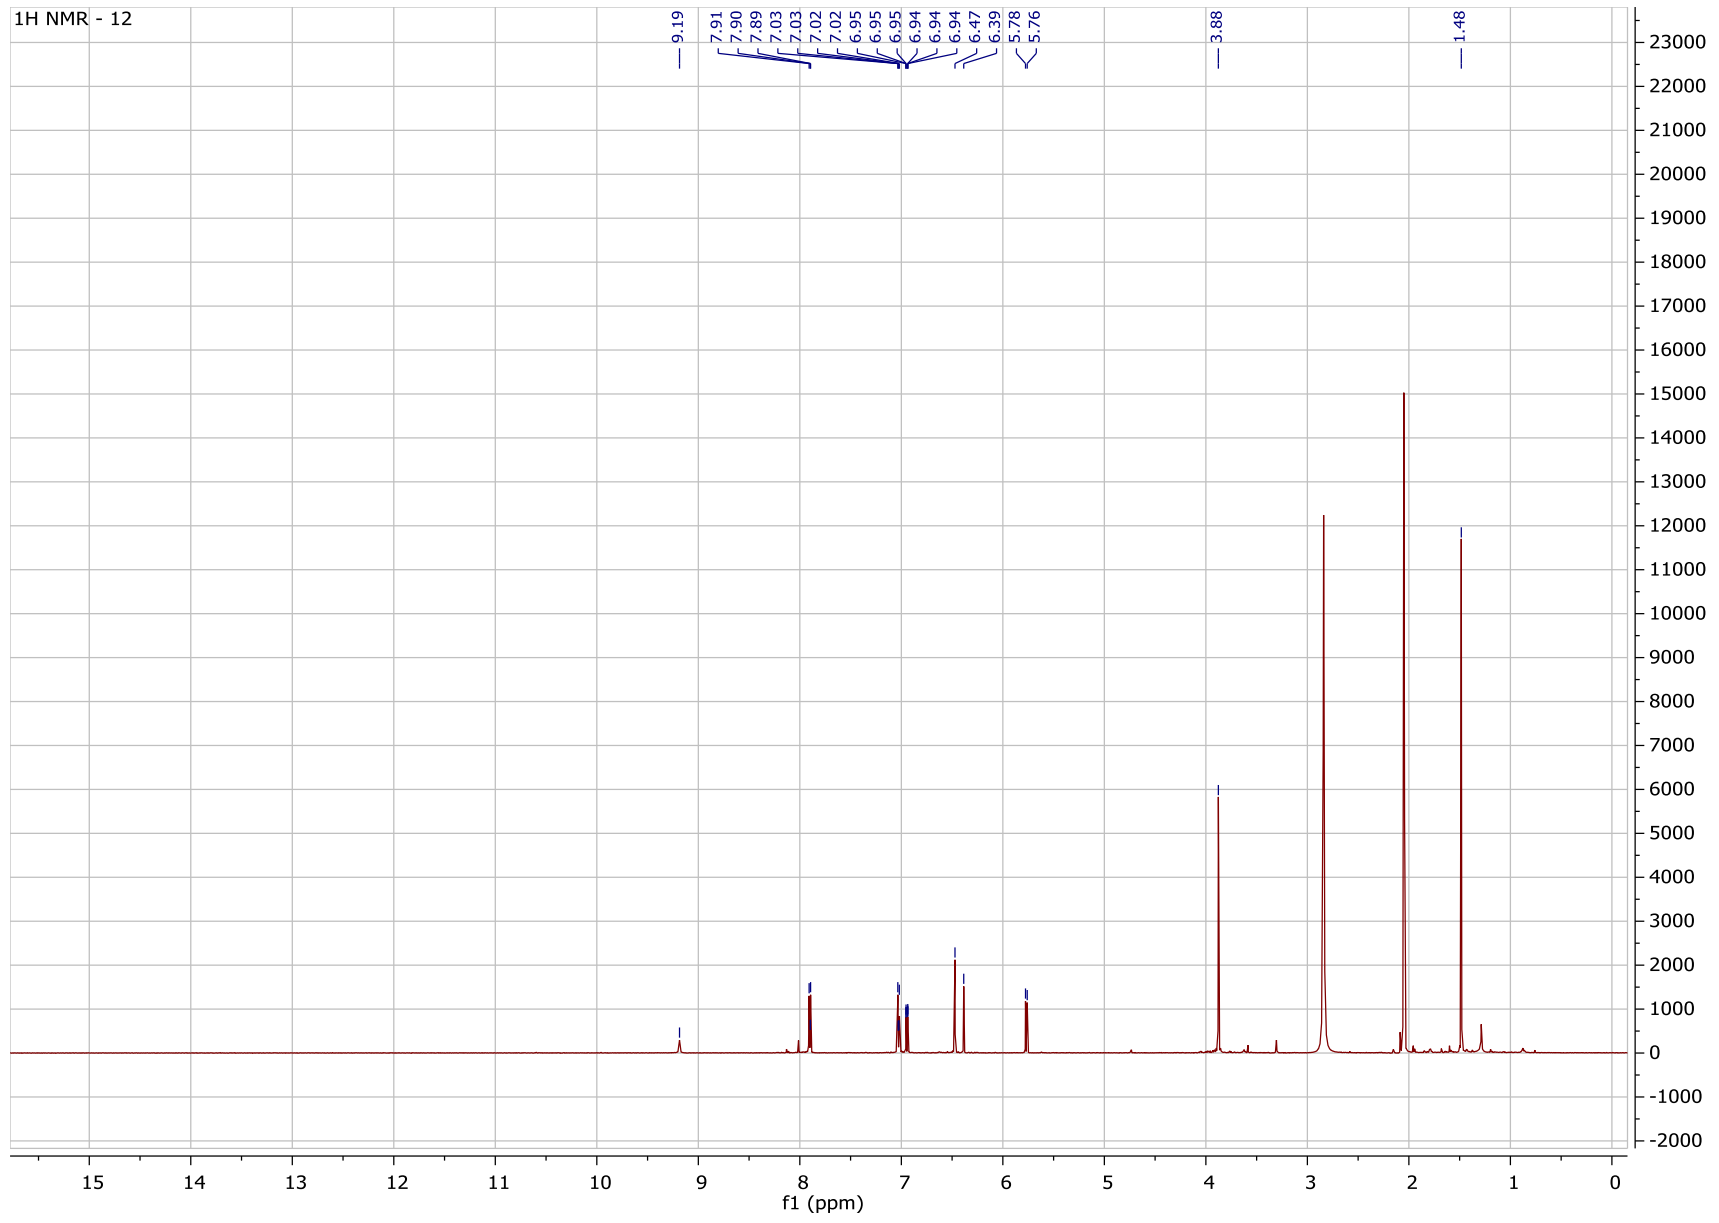

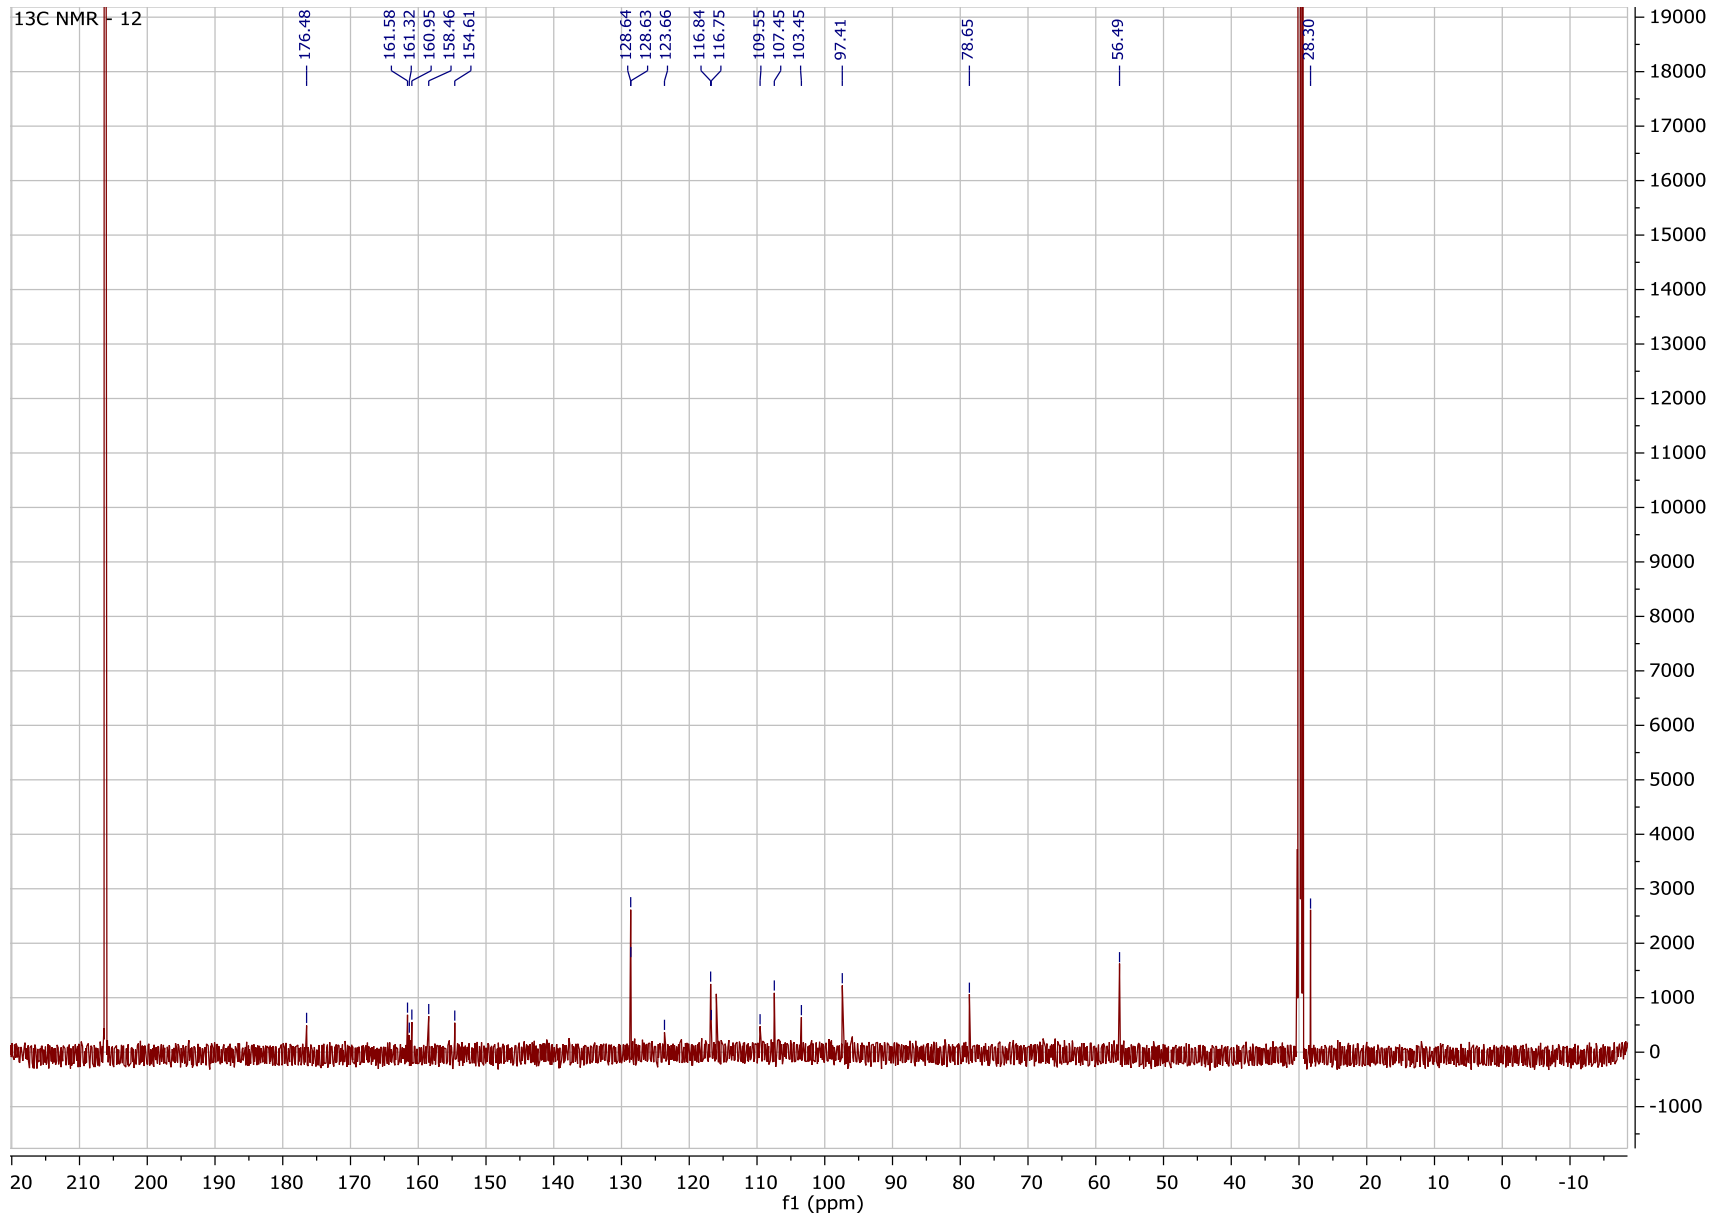

1H NMR - 13

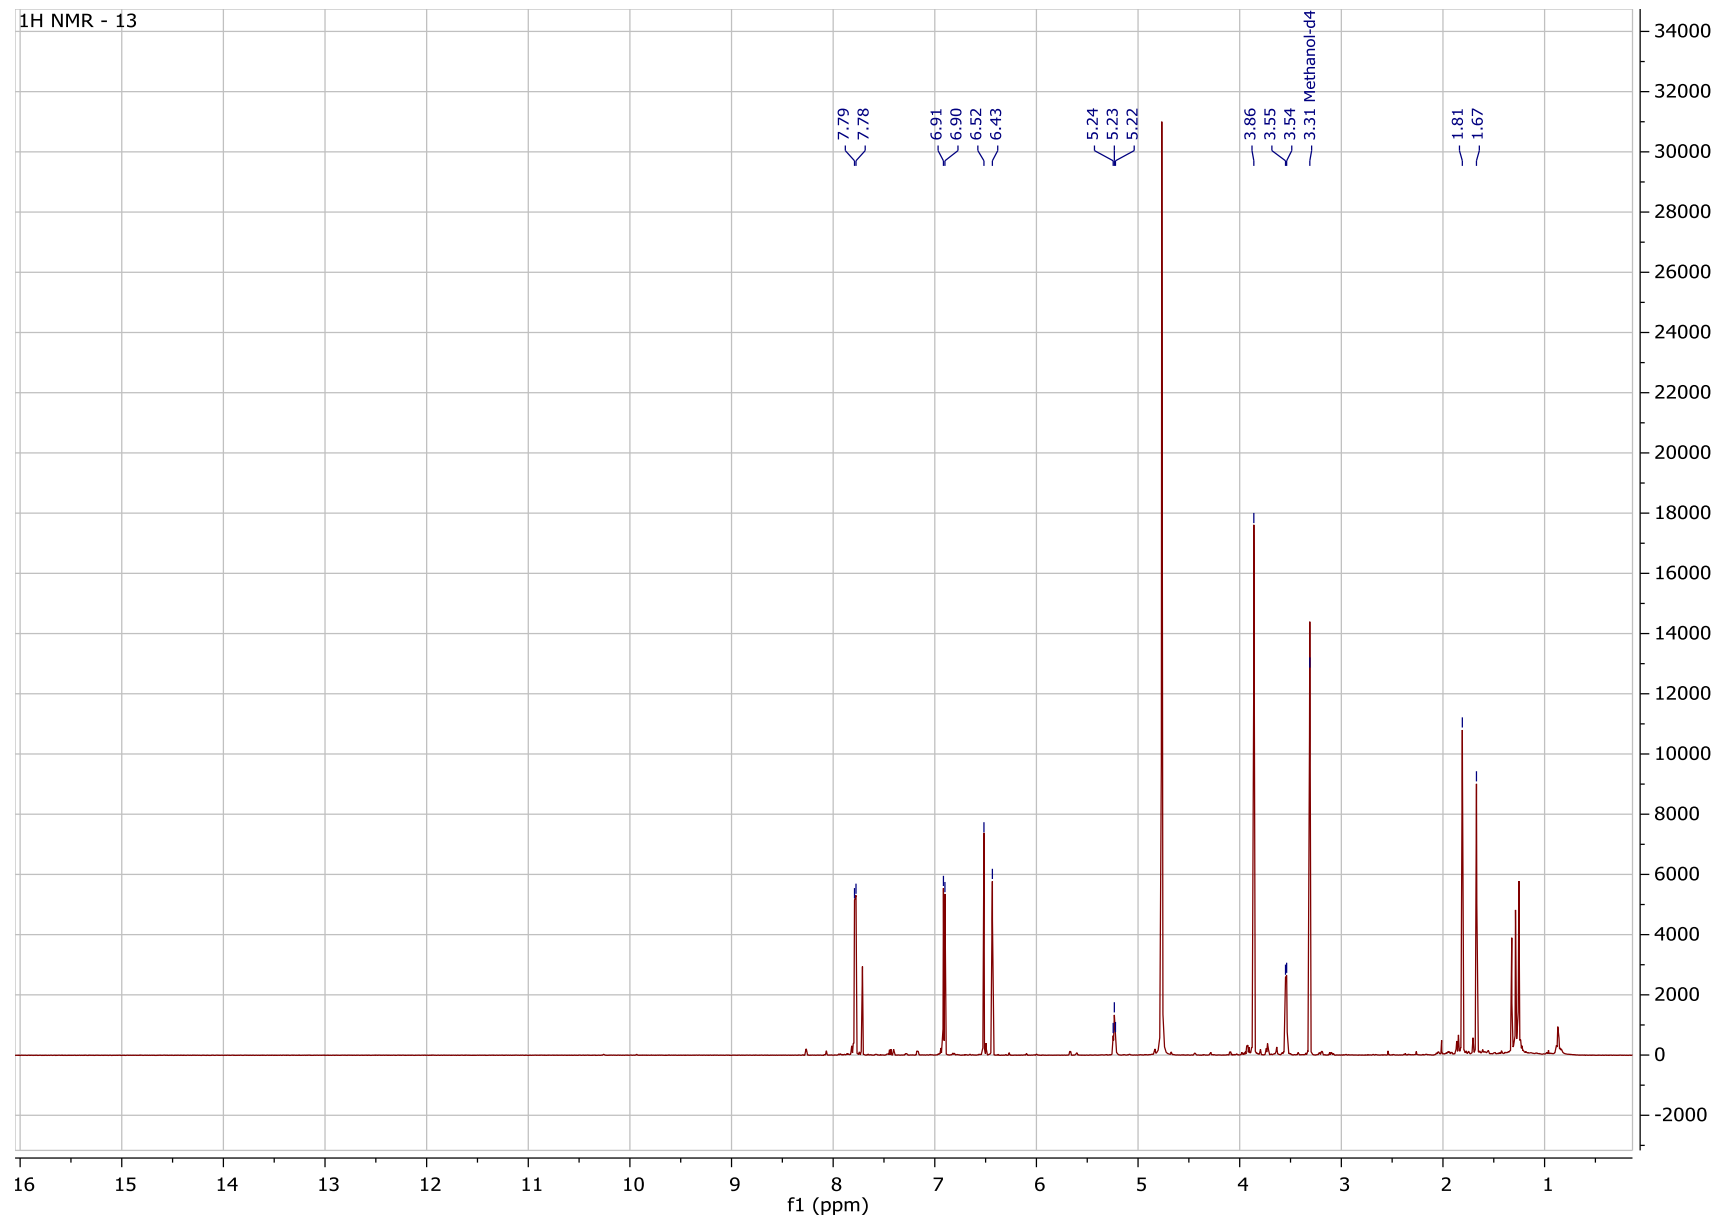

13C NMR - 13

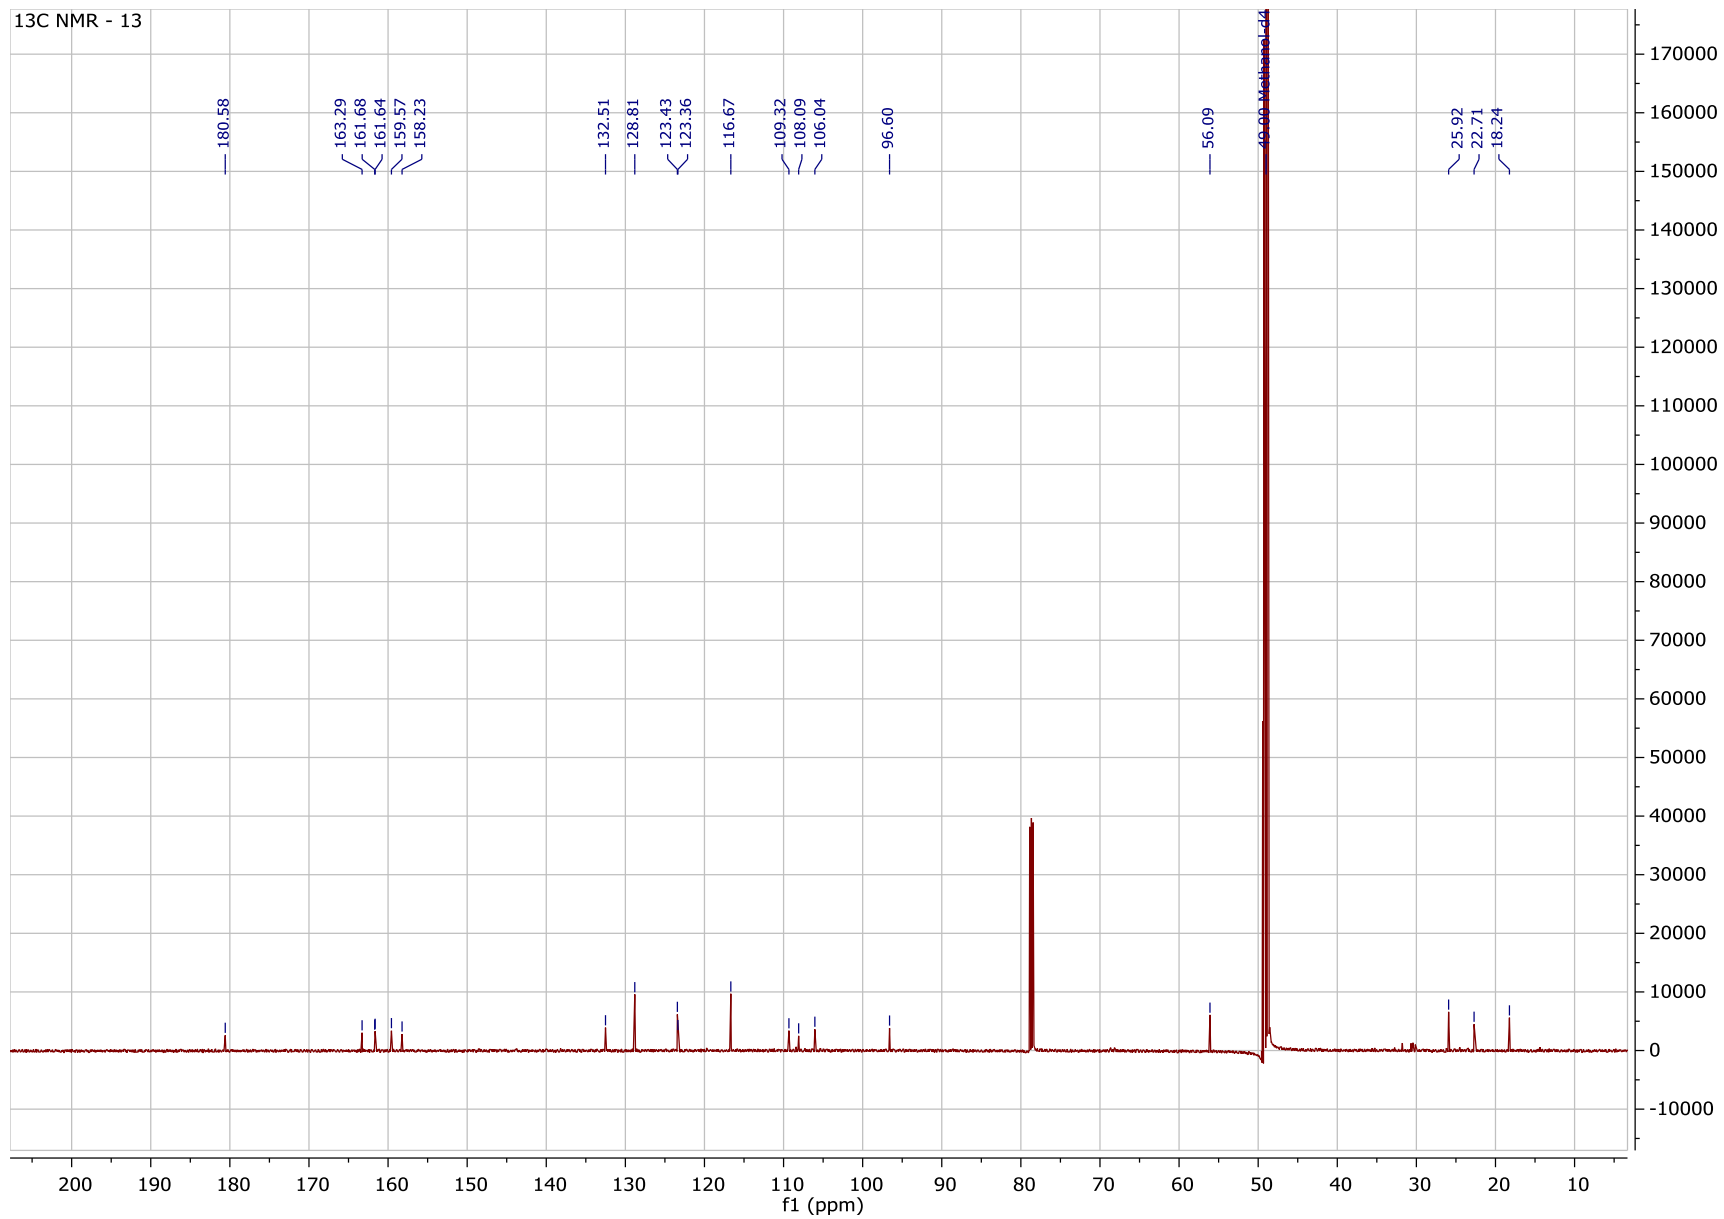

1H NMR - 14

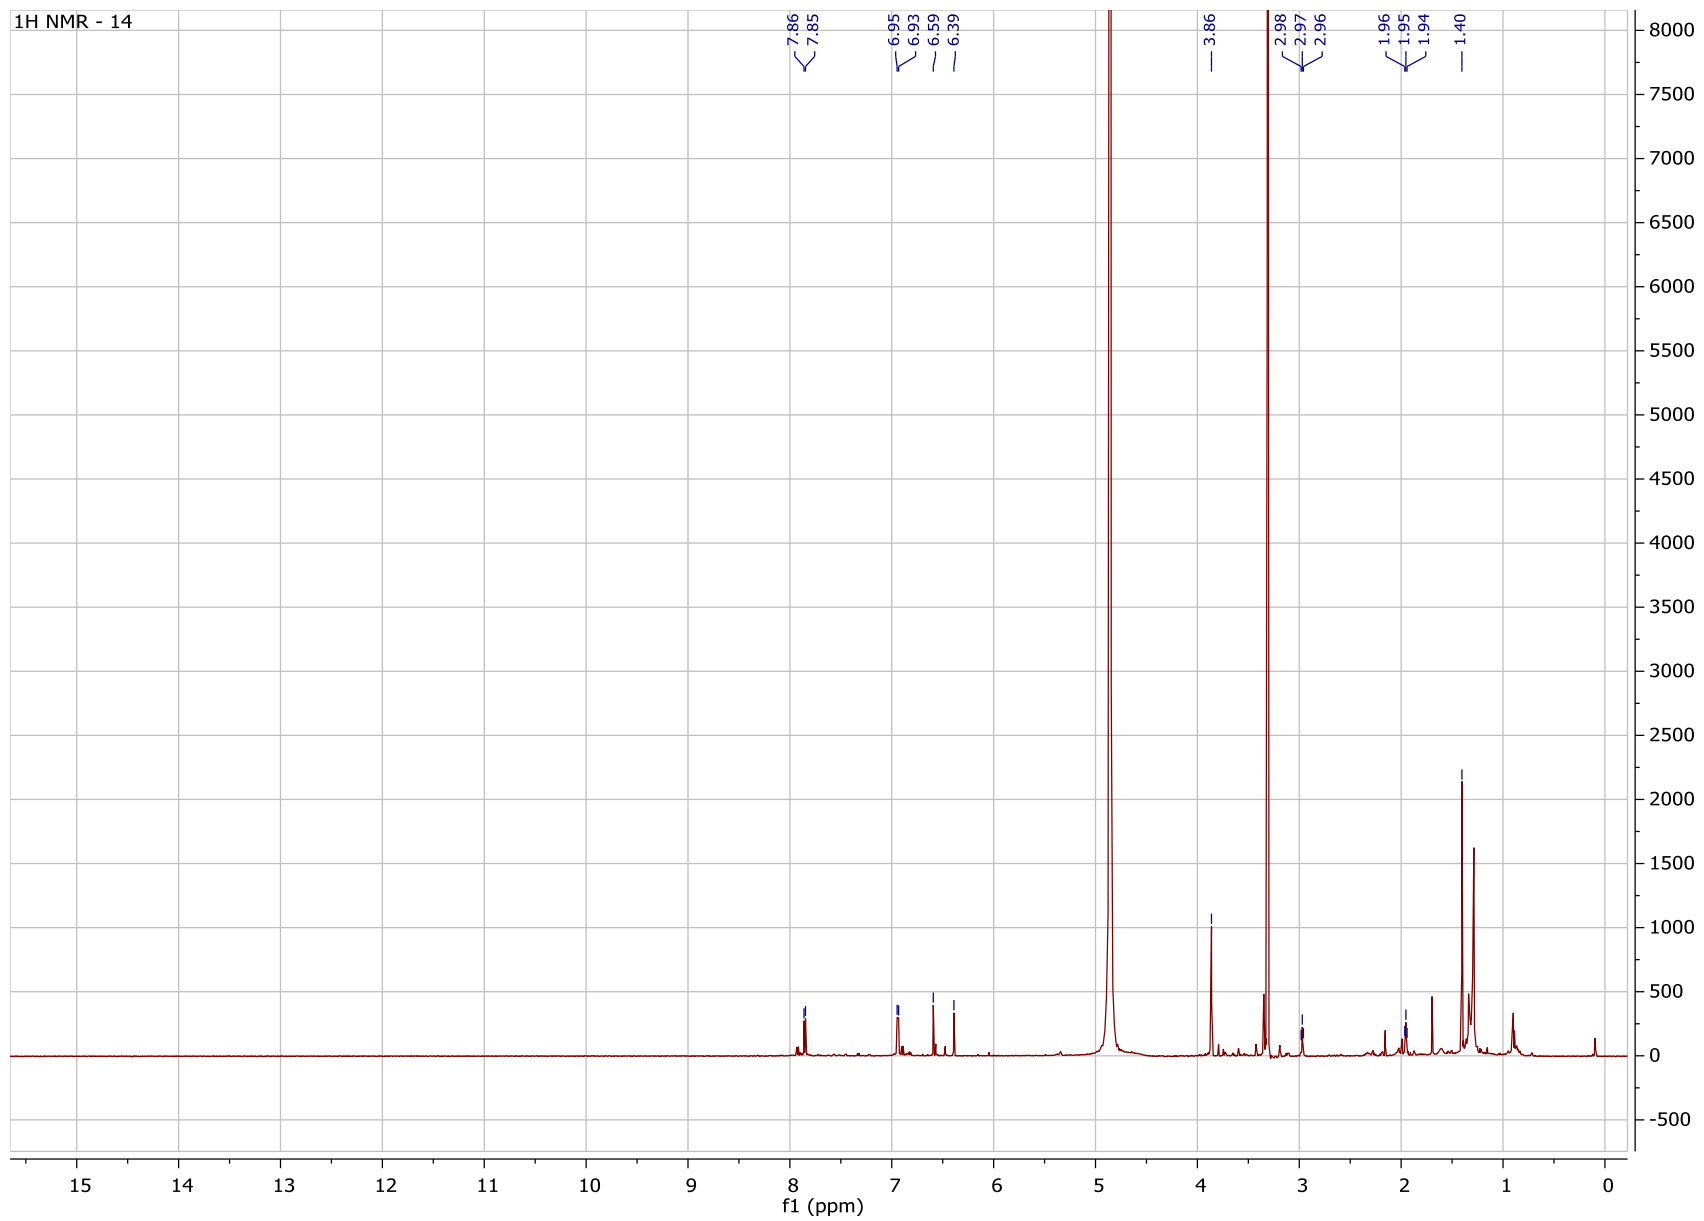

<sup>13</sup>C NMR - 14

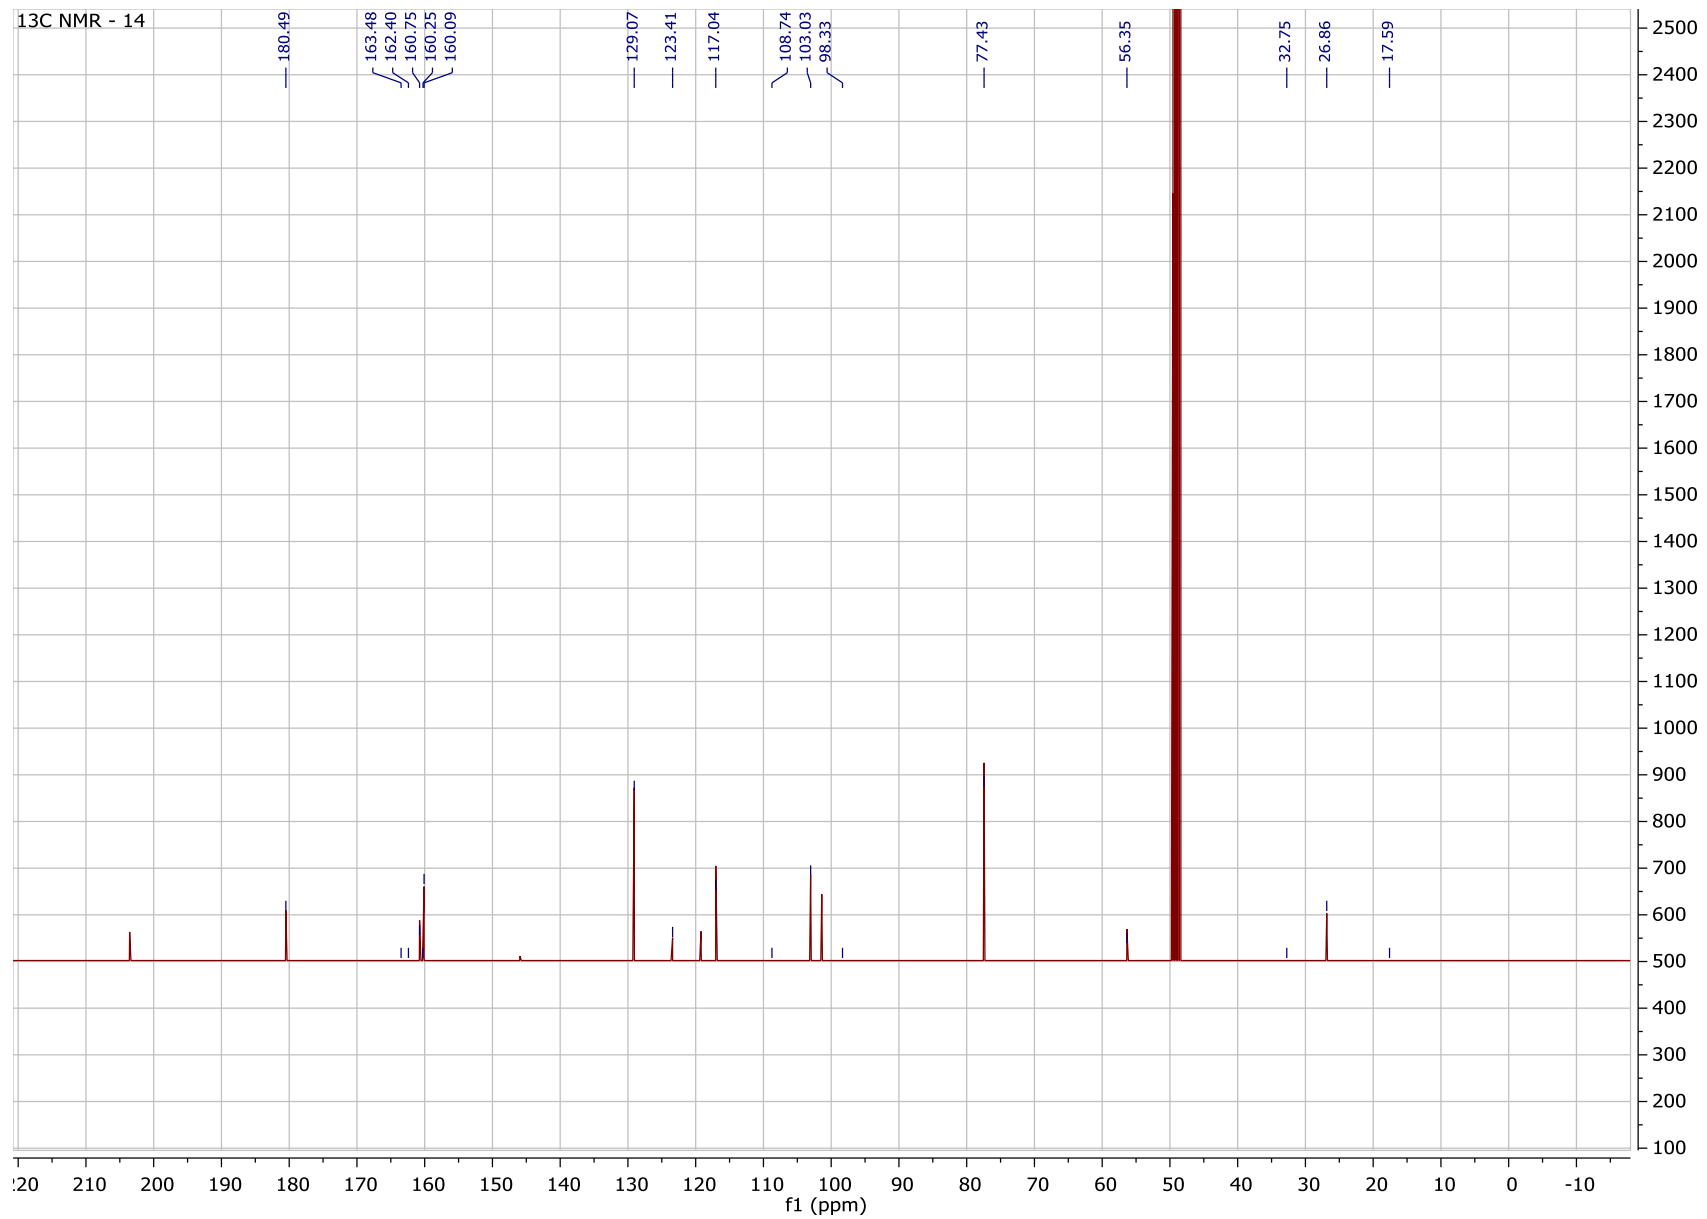

Supplement: molecules-23-00776-s001.pdf [file molecules-23-00776-s001.pdf]
